# Supplementary material for: Tailoring the surface cation configuration of Ruddlesden–Popper perovskites for controllable water oxidation performance
Source: Royal Society of Chemistry journal article supplement (doi:10.1039/d3ee00380a), 2023-01-01
Supplement: d3ee00380a1.pdf [file d3ee00380a1.pdf]

## Supplementary Information

### **Tailoring surface cation configuration of Ruddlesden-Popper perovskites for controllable water oxidation performance**

*Yu Li, Gao Chen,\* Hsiao-Chien Chen, Yanping Zhu, Liangshuang Fei, Longwei Xu, Tiancheng Liu, Jie Dai, Haitao Huang, Wei Zhou,\* and Zongping Shao\**

---

## Experimental Procedures

**Synthesis of L<sub>2</sub>N and LSNF samples.** L<sub>2</sub>N were synthesized by a typical sol-gel method. For example, 43.3 g La(NO<sub>3</sub>)<sub>3</sub>·6H<sub>2</sub>O and 14.5405 g Ni(NO<sub>3</sub>)<sub>2</sub>·6H<sub>2</sub>O (all of analytical grade, Sinopharm Chemical Reagent Co., Ltd.) were dissolved in deionized water. Then, a mixed Ethylenediamine tetraacetic acid (EDTA, C<sub>10</sub>H<sub>16</sub>N<sub>2</sub>O<sub>8</sub>, 43.836 g) and Citric acid monohydrate (CA, C<sub>6</sub>H<sub>8</sub>O<sub>7</sub>, 63.042 g) solution were added to form a molar ratio of 1:2:1 for the metal ions/CA/EDTA. Next, an aqueous ammonium hydroxide solution (NH<sub>3</sub>·H<sub>2</sub>O, 28%) was added to adjust the pH to approximately 6. The mixed solution was then heated at 90 °C until it formed a gel. We then put the gel in the oven for 5 hours. Finally, the obtained precursor was put into a 1000 °C muffle furnace for 5 h to obtain the perovskite powder. LSNF was synthesized via the same process above except the different stoichiometric amounts. The dissolution process took place in a quartz beaker.

**Synthesis of L<sub>2</sub>N@NF samples.** Firstly, the obtained L<sub>2</sub>N powders were grounded by ball-milling for 1 hour. Then, we added 0.075g FeCl<sub>3</sub>·6H<sub>2</sub>O into 30 ml deionized water to form a solution (~ 0.01 M). 0.2g grounded L<sub>2</sub>N was then added into it. The suspension liquid was then placed in an ultrasonic cell disruptor for half an hour. After the end of it, the product was washed several times with deionized water by centrifugation. The obtained product was placed in the oven to dry. Next, we make the FeCl<sub>3</sub>·6H<sub>2</sub>O solution 30 ml again with 0.05g FeCl<sub>3</sub>·6H<sub>2</sub>O and added the dried product into it with the ultrasonic assisted for 30 minutes. Finally, the obtained L<sub>2</sub>N@NF powders were washed with ultrapure water by centrifugation and dried.

**Synthesis of L<sub>2</sub>N@NF<sub>x</sub> (L<sub>2</sub>N@NF<sub>0.51</sub>, L<sub>2</sub>N@NF<sub>0.78</sub>, L<sub>2</sub>N@NF<sub>1.63</sub>, and L<sub>2</sub>N@NF<sub>1.99</sub>) samples.** The steps for synthesis are the same as L<sub>2</sub>N@NF, except for FeCl<sub>3</sub> solution concentration. Briefly, 0.03g, 0.05g, 0.11g, and 0.2g FeCl<sub>3</sub>·6H<sub>2</sub>O were added separately to 30 ml deionized water to form the solution and then 0.2g grounded L<sub>2</sub>N was added to them for 0.5 h. After several centrifuges, the products were transferred to 30 ml aqueous solution containing 0.05g FeCl<sub>3</sub>·6H<sub>2</sub>O for 30 minutes again with the ultrasonic assisted. Finally, the obtained L<sub>2</sub>N@NF<sub>0.51</sub>, L<sub>2</sub>N@NF<sub>0.78</sub>, L<sub>2</sub>N@NF<sub>1.63</sub> and L<sub>2</sub>N@NF<sub>1.99</sub> samples were centrifuged and dried. The x here stand for the value of (Ni+Fe)/La. According to the pH meter test, solutions of 0.03g, 0.05g, 0.075g, 0.11g and 0.2g FeCl<sub>3</sub>·6H<sub>2</sub>O dissolved in 30 ml deionized water have pH values of 2.74, 2.61, 2.53, 2.48 and 2.38, respectively.

**Synthesis of L<sub>2</sub>N-Fe samples.** L<sub>2</sub>N-Fe was synthesized by introducing Fe during the L<sub>2</sub>N electrochemical testing. Firstly, 0.1 M aqueous Fe(NO<sub>3</sub>)<sub>3</sub> solution was prepared from Fe(NO<sub>3</sub>)<sub>3</sub>·9H<sub>2</sub>O and ultrapure water. Then, adding 0.08 ml of 0.1 M Fe(NO<sub>3</sub>)<sub>3</sub> solution into the 100 ml of 1.0 M KOH electrolyte. Continuous linear voltammetry scanning until performance no longer changes. According to the calculation, the pH of the electrolyte is almost unchanged.

**Materials characterization.** The XRD patterns of samples were obtained from the X-ray powder diffractometer (Rigaku Smartlab, Cu K $\alpha$  radiation,  $\lambda$  = 1.5418 Å). FESEM (HITACHI S-4800) was used to conduct the morphologies of the catalysts and TEM (FEI Tecnai G2 T20) was used to get the lattice parameters equipped with a Philips Tecnai T30F field emission instrument. Desorption curve and pore size distribution were obtained with a Brunauer-Emmett-Teller (BET) analysis system with a N<sub>2</sub> adsorptive medium. The valence state and content of the elements was obtained with the XPS (PHI550). The 4d orbitals of La, 3p orbitals of Ni and 2p orbitals of Fe were tested to determine the content of surface elements. The XAS spectra were collected in total-fluorescence-yield mode at ambient air in BL-12B2 at SPring-8, JARSI.

**Electrode preparation and electrochemical characterization.** Electrochemical properties and the

electrochemical oxygen intercalation were tested in an O<sub>2</sub>-saturated and argon-saturated 1.0 M KOH solution, respectively. The glassy carbon electrode (PINE, 5 mm diameter, 0.196 cm<sup>2</sup>) was used as the working electrode and the Hg/HgO electrode as the reference electrode. Carbon rods serve as counter electrodes. The glassy carbon electrode is supported with catalysts and connected to a CHI 760E electrochemistry electrochemical station. 10 mg catalyst, 10 mg super P, 1 mL anhydrous ethanol, and 100 μL Nafion were mixed and ultrasonic for 30 min. Spread 5 μL ink evenly on the glassy carbon electrode. LSV was performed from 0.2 V to 1 V versus Hg/HgO at the RDE at 1600 rpm with a sweep rate of 5 mV s<sup>-1</sup>. 1 mg catalyst and 0.1 mg Super P were uniformly loaded on the 1 cm × 1 cm carbon paper to test the stability. Electrochemical oxygen insertion and extraction test was performed at a scan rate of 20 mV s<sup>-1</sup> between -0.2 V and 0.6 V versus Hg/HgO. To obtain the specific oxidative charge from the integration of oxidation waves, the baseline of each cyclic voltammetry (CV) was fit and subtracted from the specific current density. Oxygen ion diffusion coefficient was performed with the chronoamperometry. A potential of more than E<sub>1/2</sub> (defined as the potential halfway between the peak currents for oxygen insertion and extraction) 50 mV is applied to the working electrode to obtain chronoamperometry data. The measured data were plotted as current versus the inverse square root of time (i vs. t<sup>-1/2</sup>), in which a linear regression was used to obtain the intercept with the t<sup>-1/2</sup> axis (at i = 0). According to the equation  $\lambda = a(D_0t)^{-1/2}$ , the oxygen ion diffusion coefficient (D<sub>o</sub>) can be calculated. Here, λ is a dimensionless shape factor and was assumed to be 2. a need to be estimated with the relation of  $S = 6/(2ap)$ , where S is the BET specific surface area and p is the theoretical density which can be obtained from the Rietveld analysis. Turnover frequency (TOF) was investigated via the following equation:

$$\text{Turnover frequency (TOF)} = \frac{j}{n \times F \times N_s}$$

Where j is the current, n is the number of electrons transferred to evolve a molecule of the product (for H<sub>2</sub> and O<sub>2</sub>, n is 2 or 4), F is Faradaic constant and N<sub>s</sub> is the number of moles of active sites available for the catalysis. S-number was calculated via following equation:

$$S - \text{number} = \frac{n(O_2)}{n(\text{dissolved Ni})}$$

The amount of produced oxygen was calculated from total charge and the dissolved iridium was obtained from ICP-MS results.

**Isotope-Labeled Method.** Firstly, A carbon paper with catalysts (2 mg cm<sup>-2</sup>) was activated in <sup>18</sup>O labeled 1.0 M KOH for 10 min at 10 mA cm<sup>-2</sup>. Then, the carbon paper was carefully washed with H<sub>2</sub><sup>16</sup>O deionized water to remove surface H<sub>2</sub><sup>18</sup>O. Finally, the carbon paper was measured for three CV cycles in 1.0 m KOH with H<sub>2</sub><sup>16</sup>O. The CV test was performed at a scan rate of 4 mV s<sup>-1</sup> between 0 V and 0.7 V versus Ag/AgCl. All the tests were carried out in an H-cell. The gaseous products from the anode side were analyzed by mass spectrometry.

**MEA electrolyser system.** The AEM water electrolyzer included the anode (L<sub>2</sub>N@NF and IrO<sub>2</sub>), cathode (commercial Pt/C, 20 wt% Pt), gas diffusion layer (Ni foam), and anion exchange membrane (Sustainion X37-50 Grade RT). The L<sub>2</sub>N@NF was mixed with Super P with a weight ratio of 4:1. The obtained powder was then added into the liquid with 1 ml anhydrous ethanol and 100 μl nafion. After the ultrasound, the ink was sprayed on the Ni foam. The electrode area of anode and cathode is 4 cm<sup>2</sup> (2 cm\*2 cm), and the effective electrode area of the anode is 1 cm<sup>2</sup> (1 cm\*1 cm). In other words, anode catalysts are only sprayed in the central 1 cm\*1 cm area. The catalyst loading amount for the anode is 3 mg cm<sup>-2</sup> and 1 mg<sub>Pt</sub> cm<sup>-2</sup> for the cathode. All catalysts were sprayed on a gas diffusion layer using an ultrasonic spray machine. The AEM water electrolyzer was connected with a digital source meter (Keithley 2420). 1 M KOH was pumped into the electrolyzer with a peristaltic pump and formed a cycle. The

---

durability testing of AEM water electrolyzer was conducted at 60 °C at the current density of 200 mA cm<sup>-2</sup>. The membrane was changed every 100 h for L<sub>2</sub>N@NF.

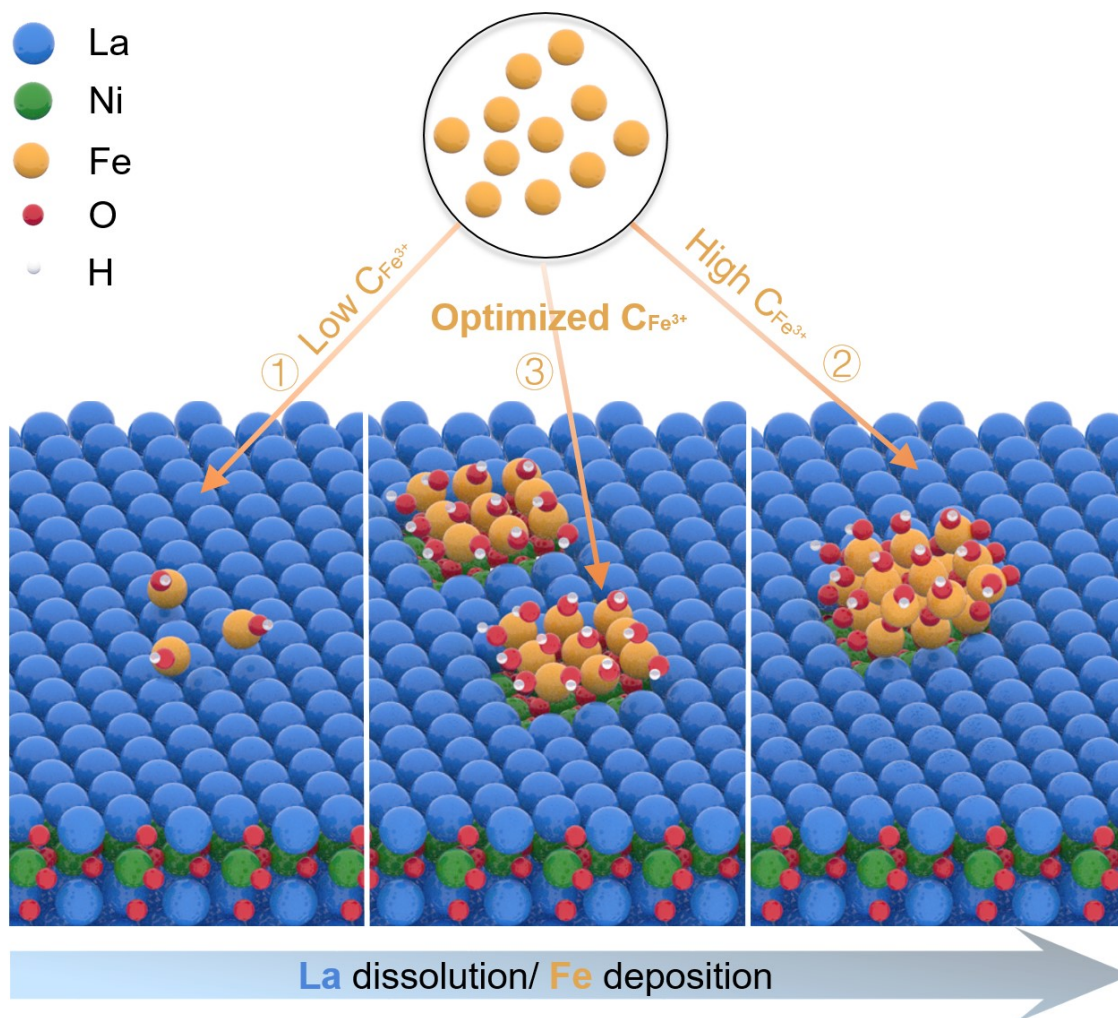

**Figure S1. Three typical surface cation configurations under different concentration of  $FeCl_3$  solution.** (Left) Low-concentration  $FeCl_3$  solution leads to the residual of inert La, which hinders the formation of Ni-Fe pairs. (Right) Excessive  $Fe^{3+}$  ions are deposited on the surface of  $L_2N@NF$ , burying the subsurface Ni-Fe pairs. (Middle) Optimized-concentration of  $Fe^{3+}$  ions yield the dissolution of La and formation of Ni-Fe pairs on the surface.

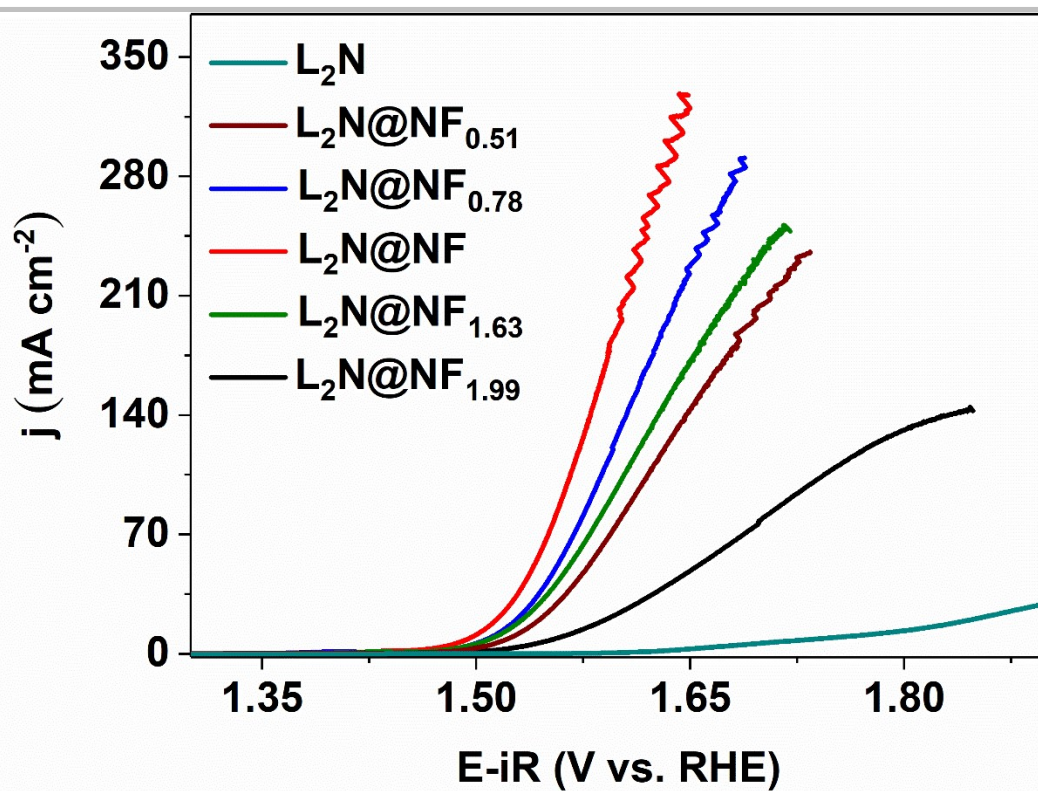

Figure S2. OER activity of pristine L<sub>2</sub>N and L<sub>2</sub>N after a series of FeCl<sub>3</sub> solutions with varying concentrations (L<sub>2</sub>N@NF<sub>x</sub>). L<sub>2</sub>N@NF exhibited the best OER activity among the L<sub>2</sub>N@NF<sub>x</sub> catalysts.

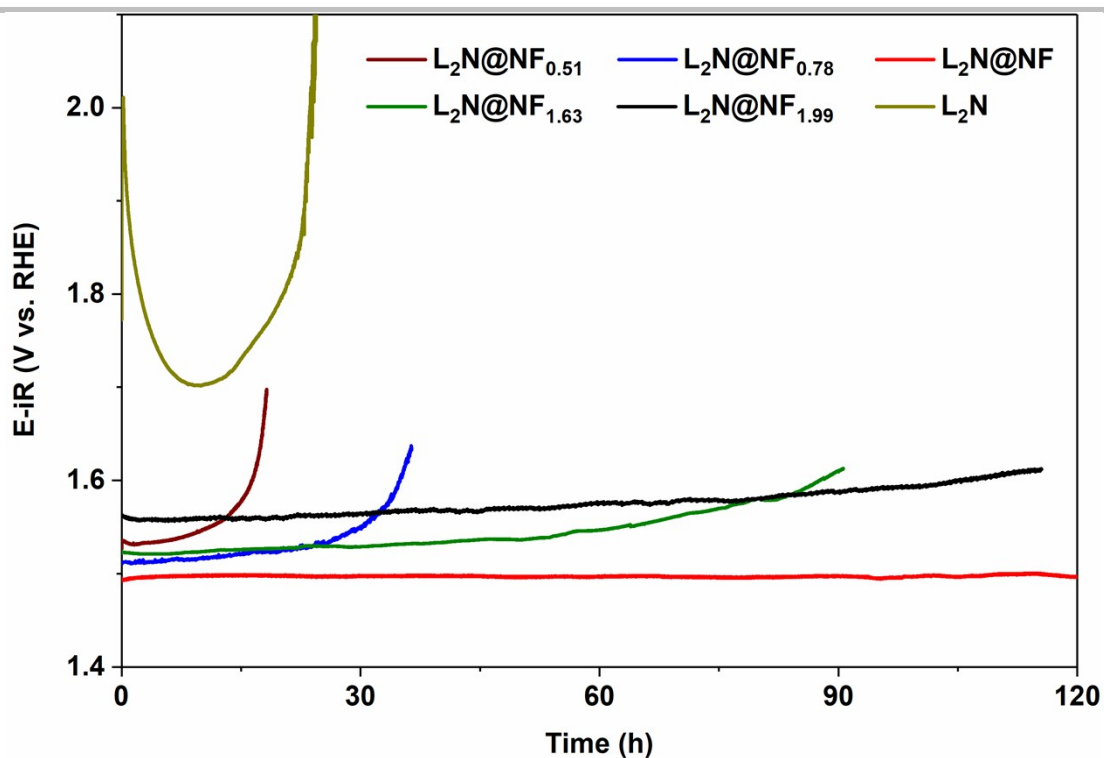

Figure S3. OER stability of pristine  $L_2N$  and  $L_2N$  after a series of  $FeCl_3$  solutions with varying concentrations ( $L_2N@NF_x$ ).

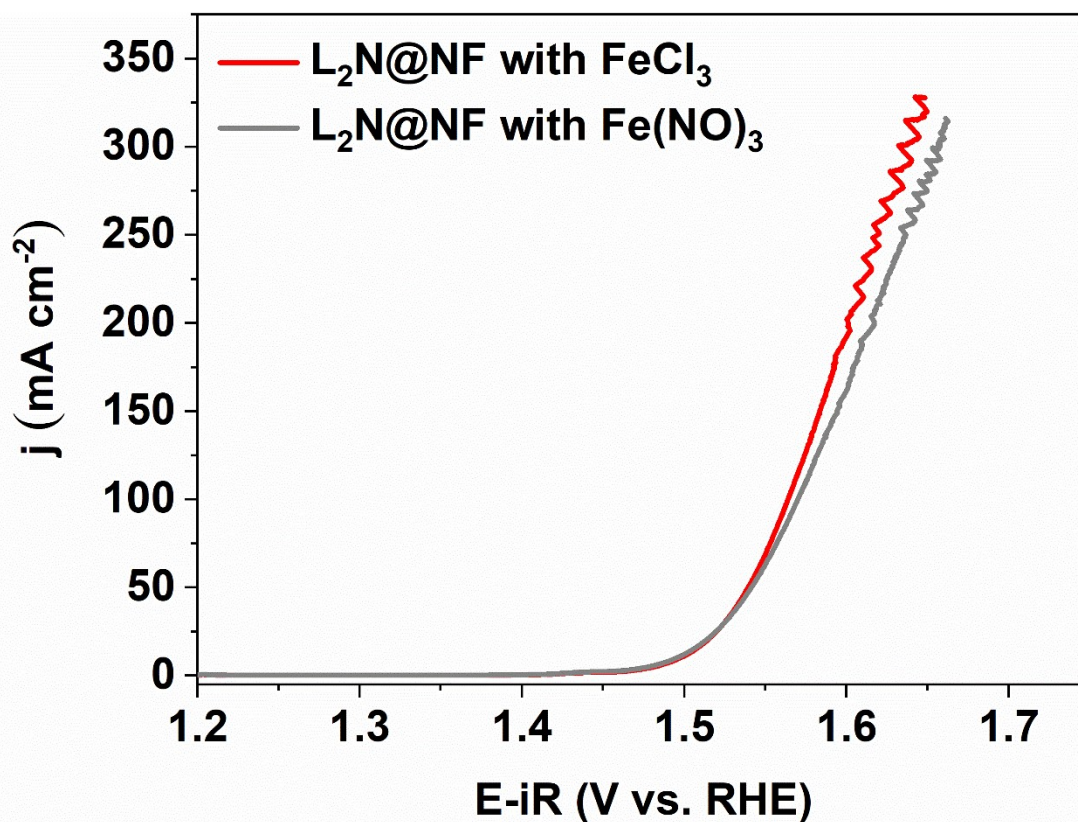

Figure S4. OER performance. The OER performance of  $L_2N@NF$  treated with the same concentration of  $FeCl_3$  solution and  $Fe(NO)_3$  solution.

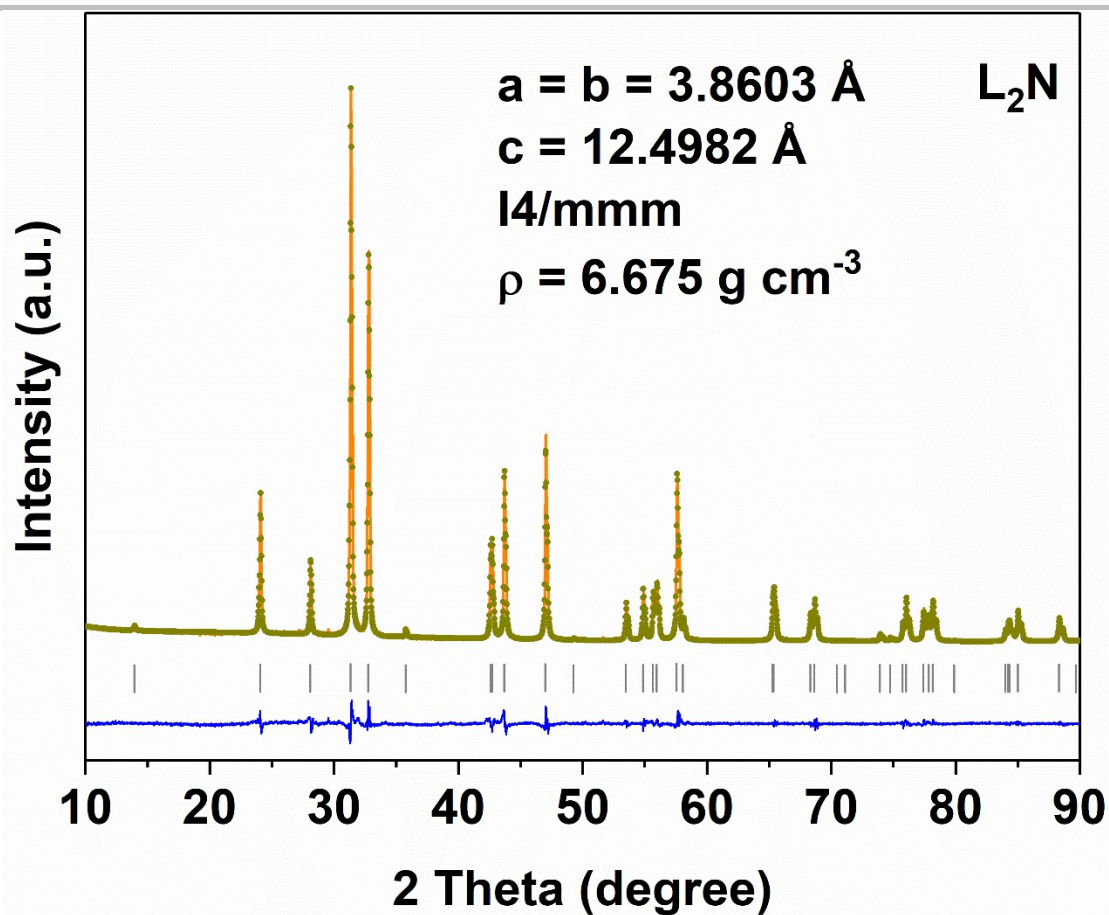

Figure S5. Rietveld refinement patterns. XRD refinement of the  $L_2N$ .

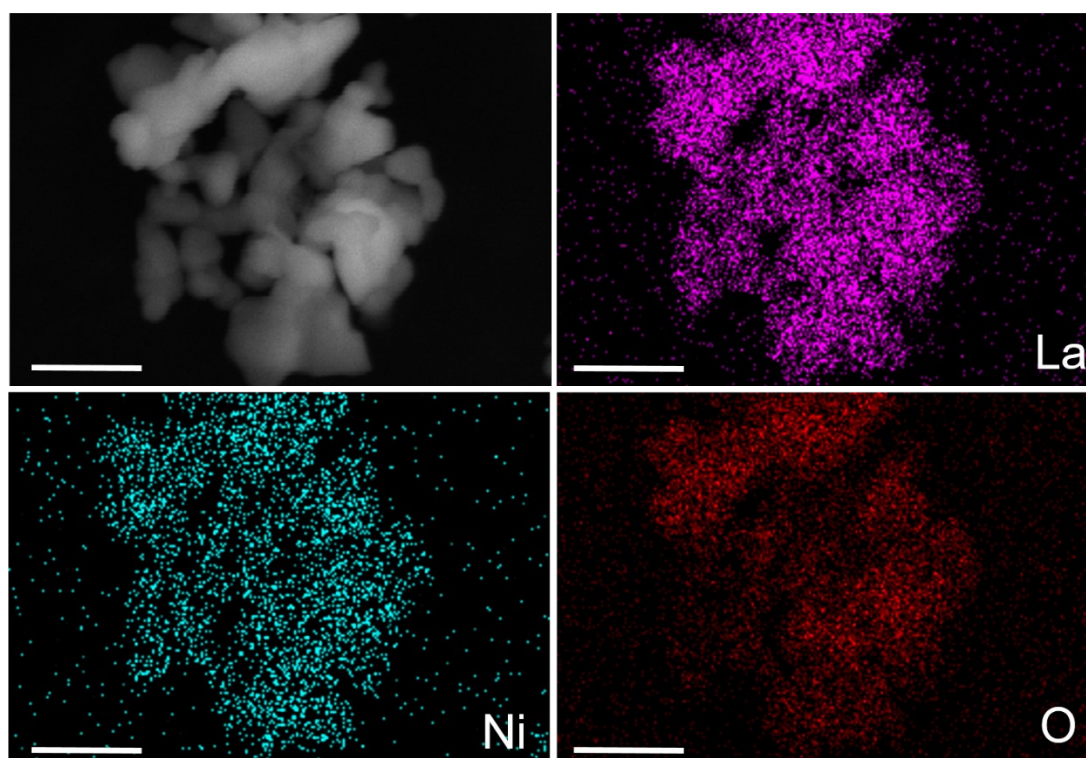

Figure S6. Elemental mappings. The elemental mappings of  $L_2N$ . The scale bar is 500 nm.



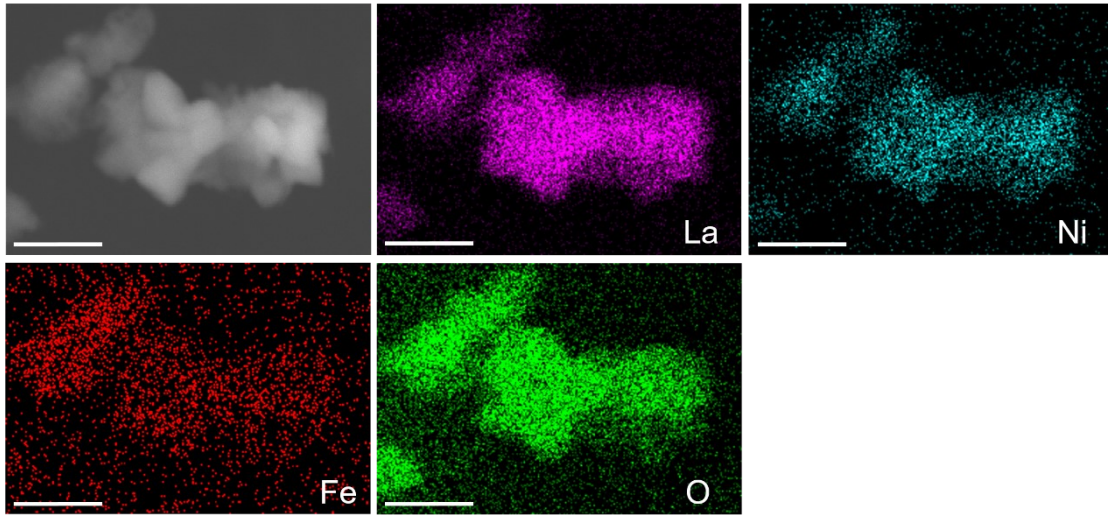

**Figure S7. Elemental mappings.** The elemental mappings of L<sub>2</sub>N@NF. The scale bar is 500 nm.

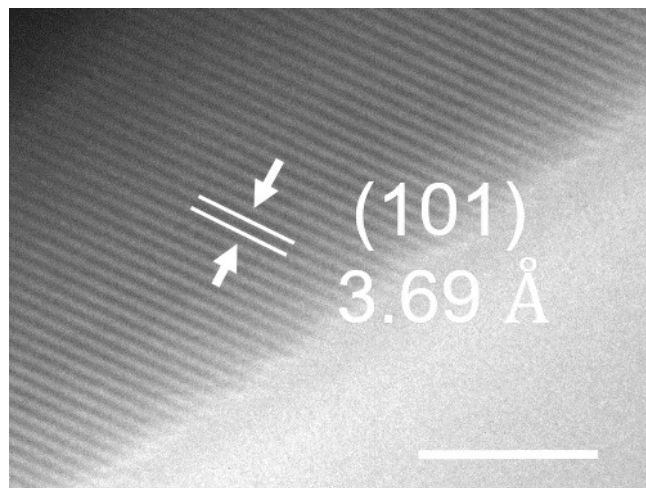

**Figure S8. TEM image of L<sub>2</sub>N.** The scale bar is 5 nm.

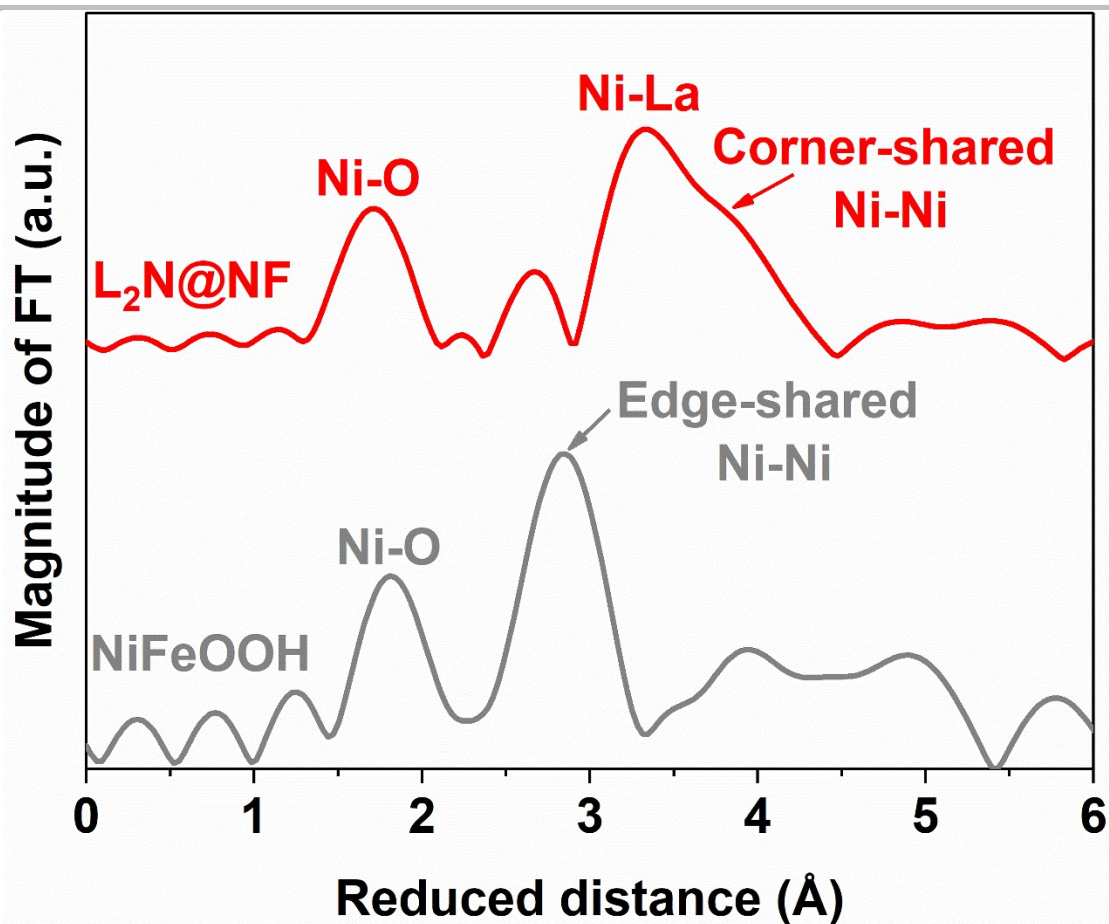

Figure S9. Fourier transform EXAFS. Ni K-edges EXAFS of  $L_2N@NF$  and NiFeOOH.

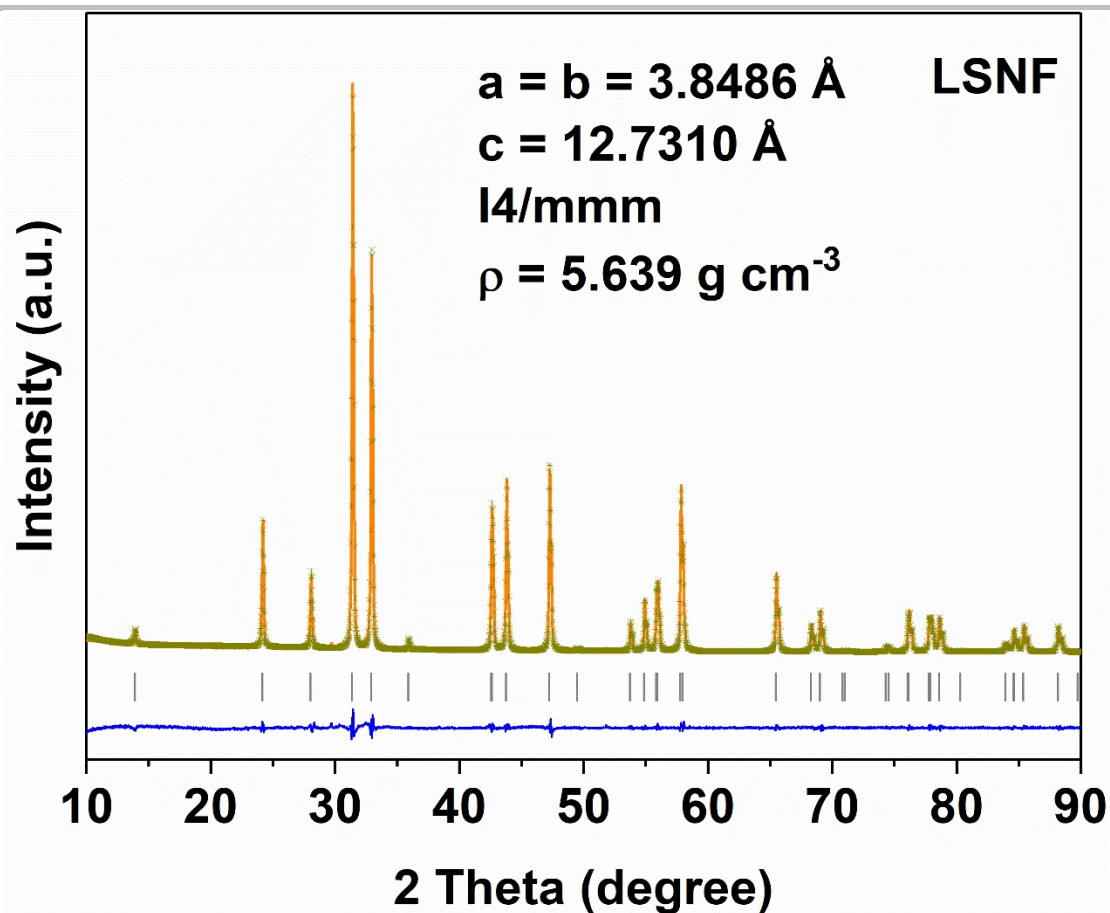

Figure S10. Rietveld refinement patterns. XRD refinement of the LSNF.

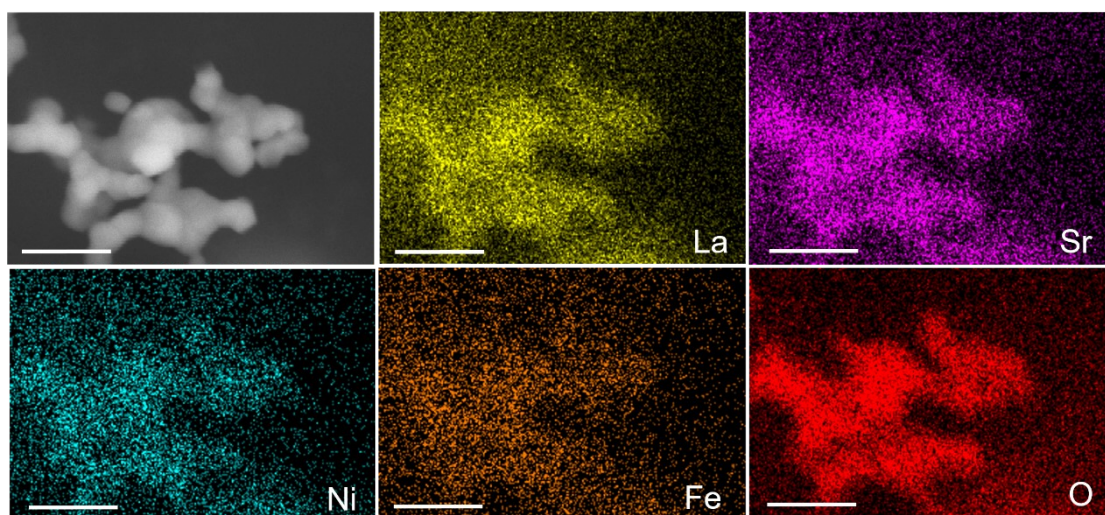

Figure S11. Elemental mappings of LSNF. The scale bar is 500 nm.

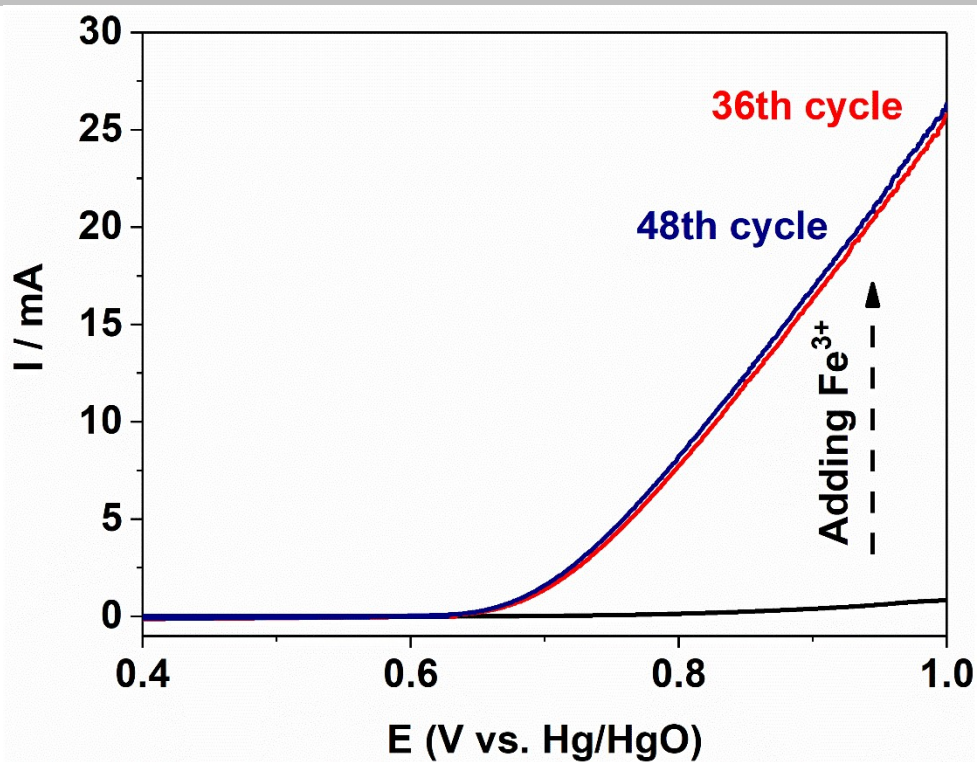

**Figure S12. LSV plots.** The 36th and 48th LSV of L<sub>2</sub>N in 1.0 M KOH electrolyte containing Fe<sup>3+</sup>. The potentials here are not corrected for iR.

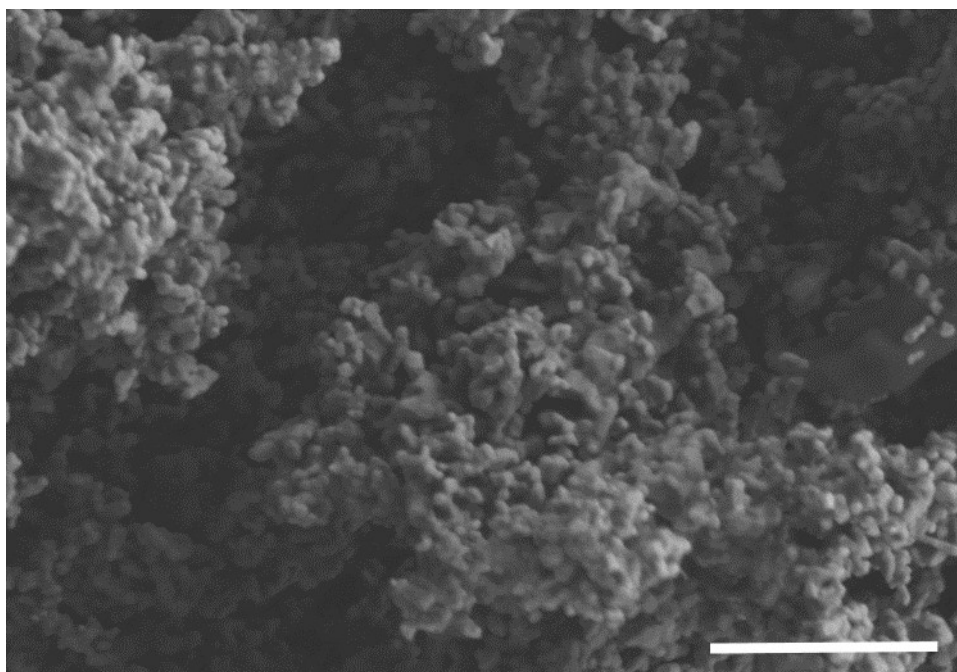

**Figure S13. SEM images of L<sub>2</sub>N-Fe.** The scale bar is 3  $\mu$ m.

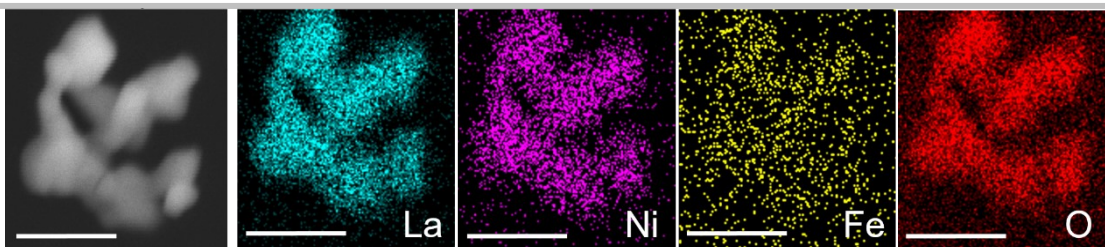

Figure S14. Elemental mappings of  $L_2N$ -Fe. The scale bar is 500 nm.

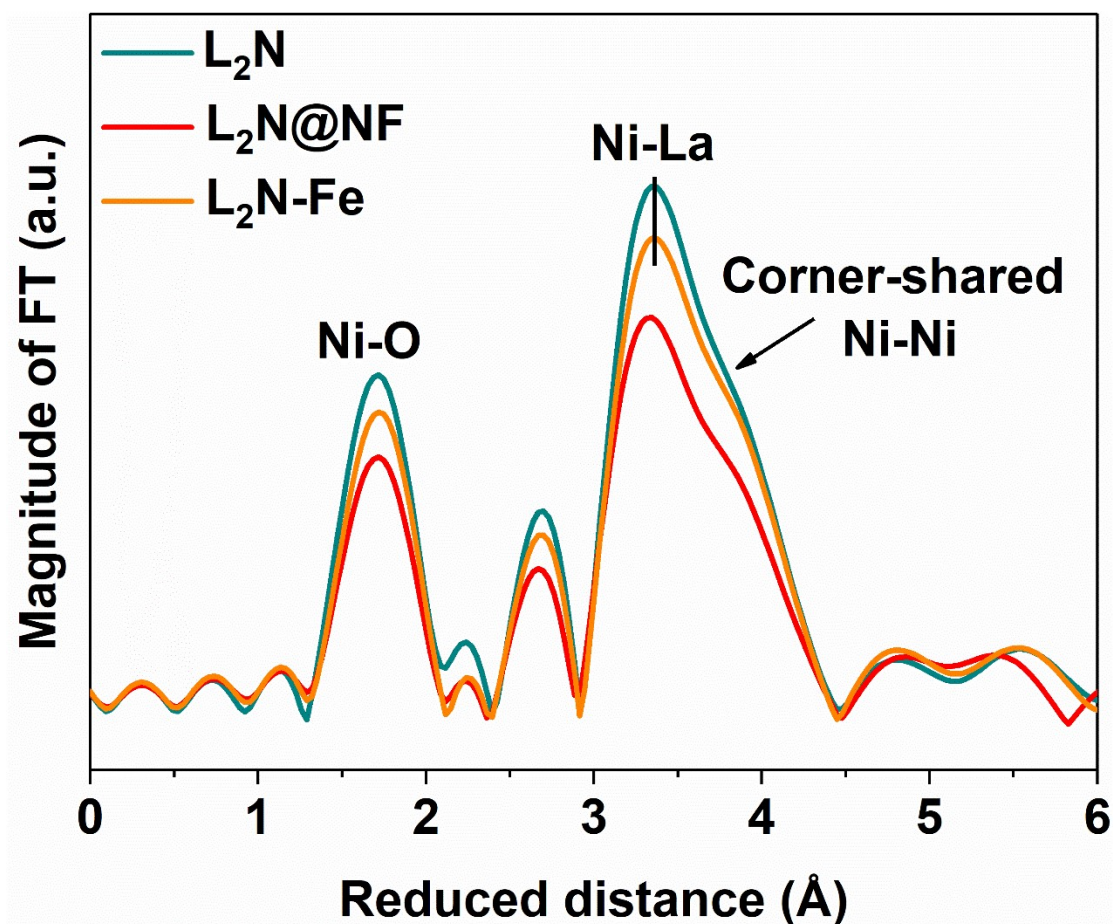

Figure S15. Fourier transform EXAFS. Ni K-edges of  $L_2N$ ,  $L_2N@NF$  and  $L_2N$ -Fe samples. Although the peak intensities of Ni-O, Ni-La, and corner-sharing Ni-Ni in  $L_2N$ -Fe were slightly lower than those for the pristine  $L_2N$ , the Ni-La peak remained at the same position (approximately 3.4 Å), indicating that there were no detectable edge-sharing Ni-Fe pairs in the  $L_2N$ -Fe sample.

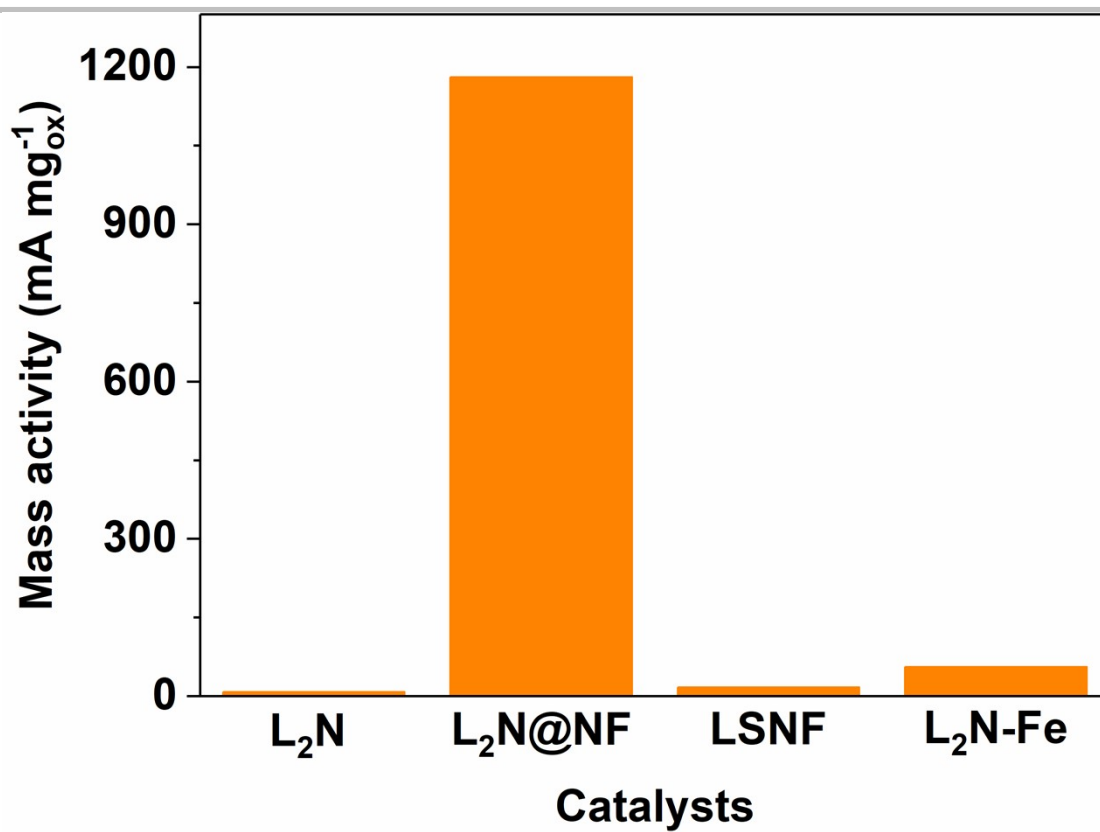

**Figure S16. The mass activities.** The mass activities of L<sub>2</sub>N, L<sub>2</sub>N@NF, LSNF and L<sub>2</sub>N-Fe.

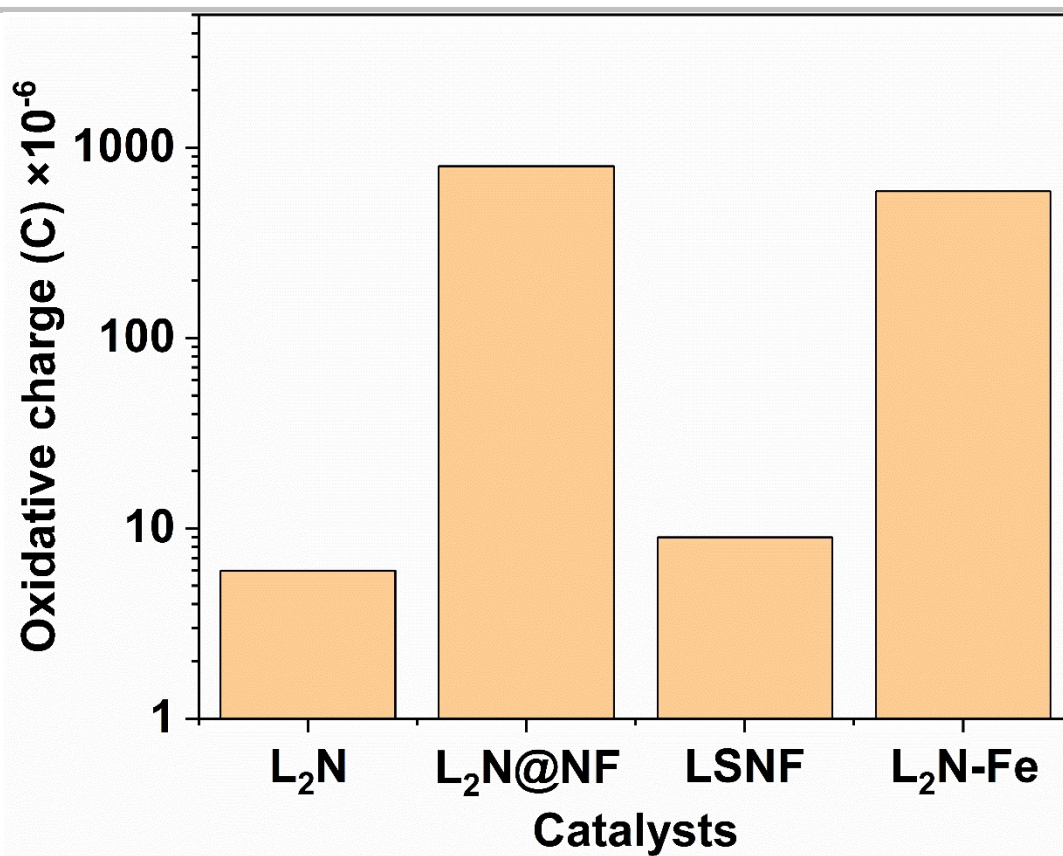

**Figure S17. oxidative charge (C).** oxidative charge of four samples obtained from the integration of oxidation waves. To facilitate the calculation of TOF, the charge unit here adopts Coulomb (C).

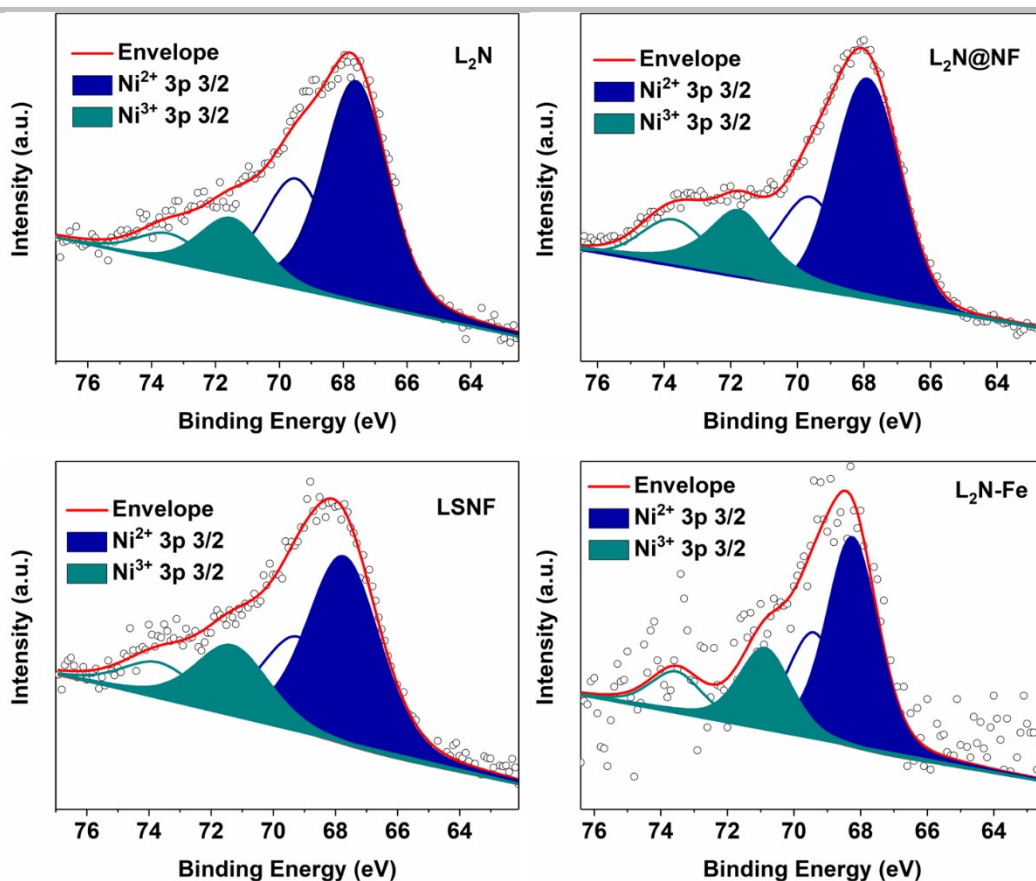

**Figure S18. XPS analyze.** XPS results for Ni 3p species on the surface of four samples. The Ni 3p spectrum was decomposed into 4 distinct components according to the previous methods developed by Burriel et. al.<sup>1</sup> The full peaks correspond to the 3p<sub>3/2</sub> lines and the empty curves to the 3p<sub>1/2</sub> lines. Ni<sup>2+</sup> was marked in navy and Ni<sup>3+</sup> was marked in dark cyan. All components used the same FWHM. The peak area of the Ni 3p<sub>1/2</sub> was set up to have half area of their counterparts in the Ni 3p<sub>3/2</sub>.



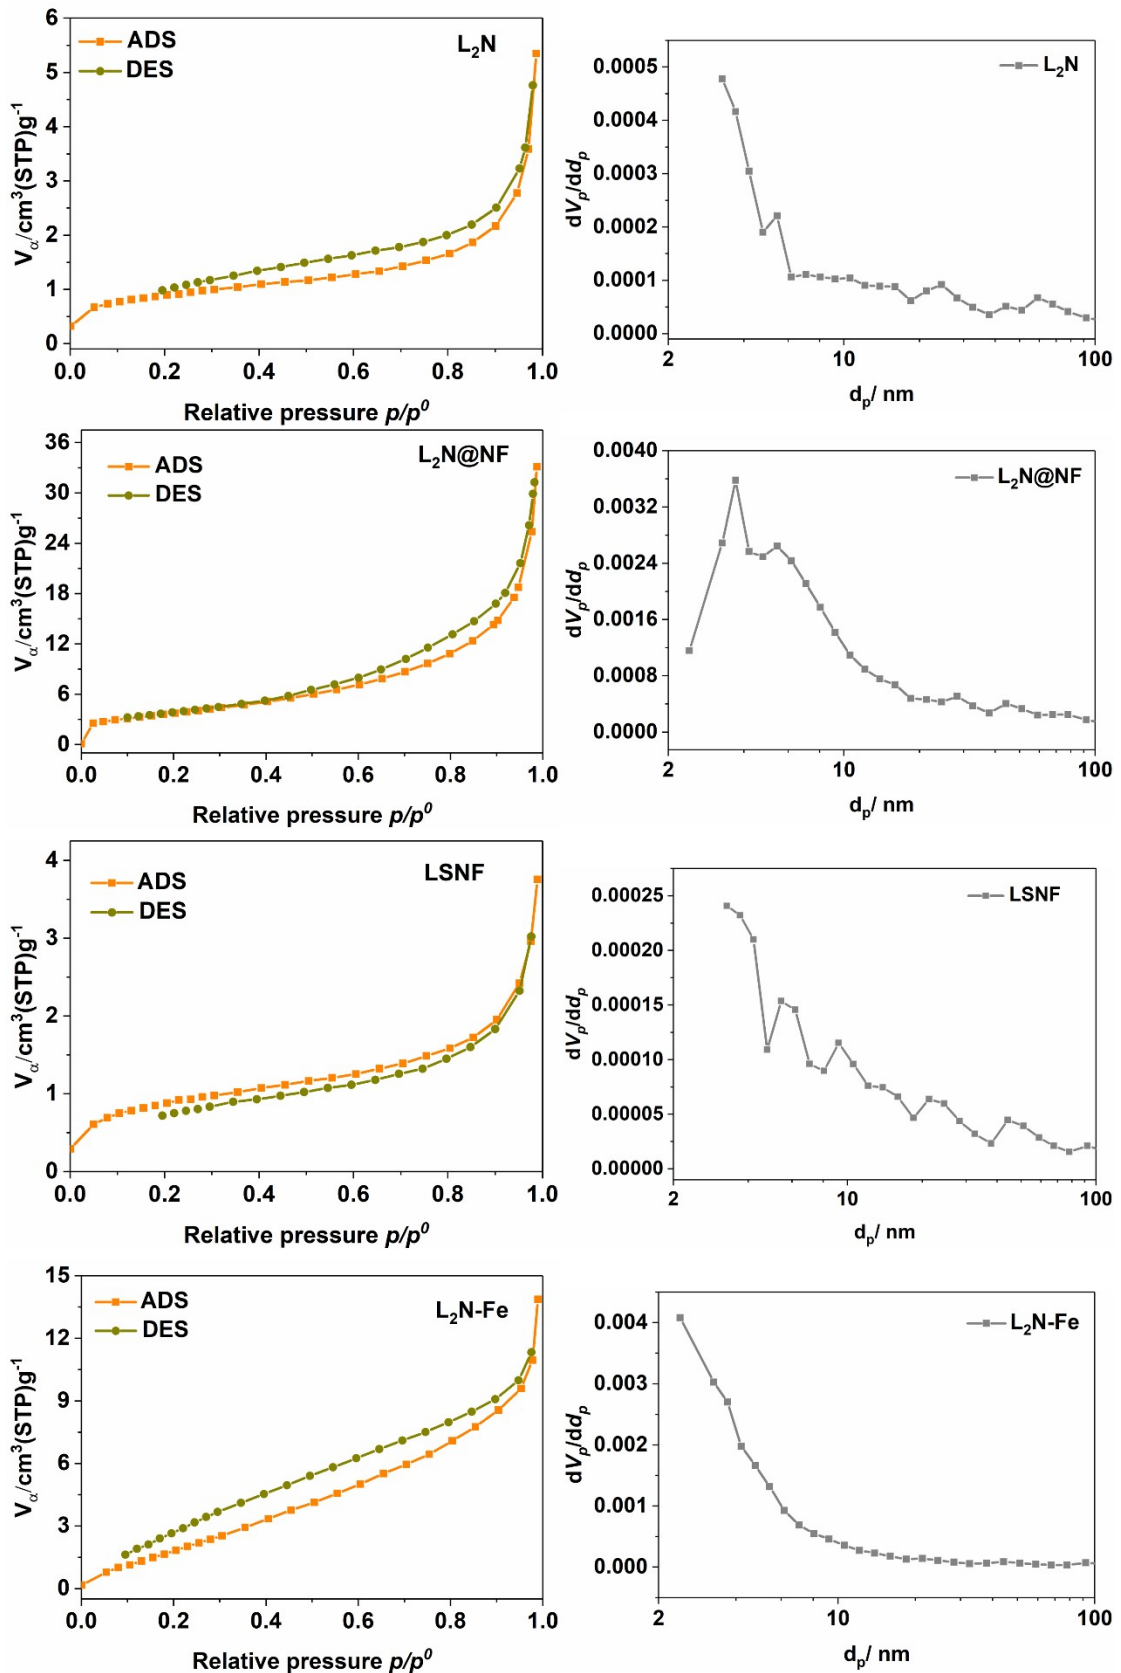

**Figure S19.  $N_2$  adsorption-desorption isotherms and pore distributions.** The left four pictures are the typical  $N_2$  adsorption-desorption isotherms of four samples, which can get the BET surface area. The right four pictures are the pore size analyze.

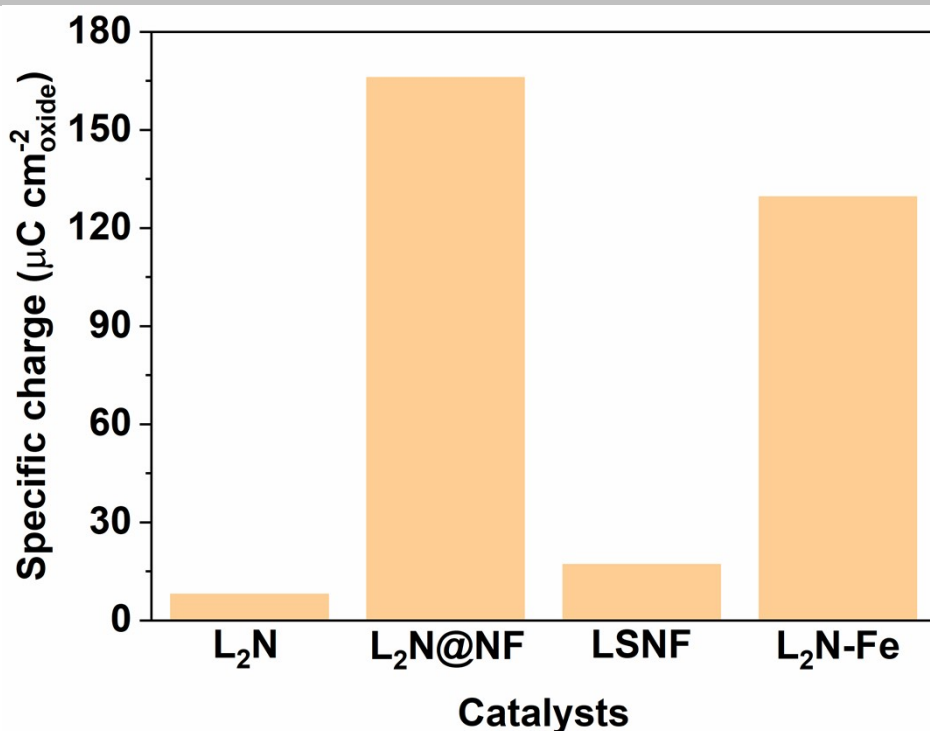

**Figure S20. Specific oxidative charge ( $\mu\text{C cm}^{-2}_{\text{oxide}}$ ).** Specific oxidative charge of four samples resulting from the integration of oxidation waves. The subscript oxide represents “the specific surface area of oxides measured by BET”.

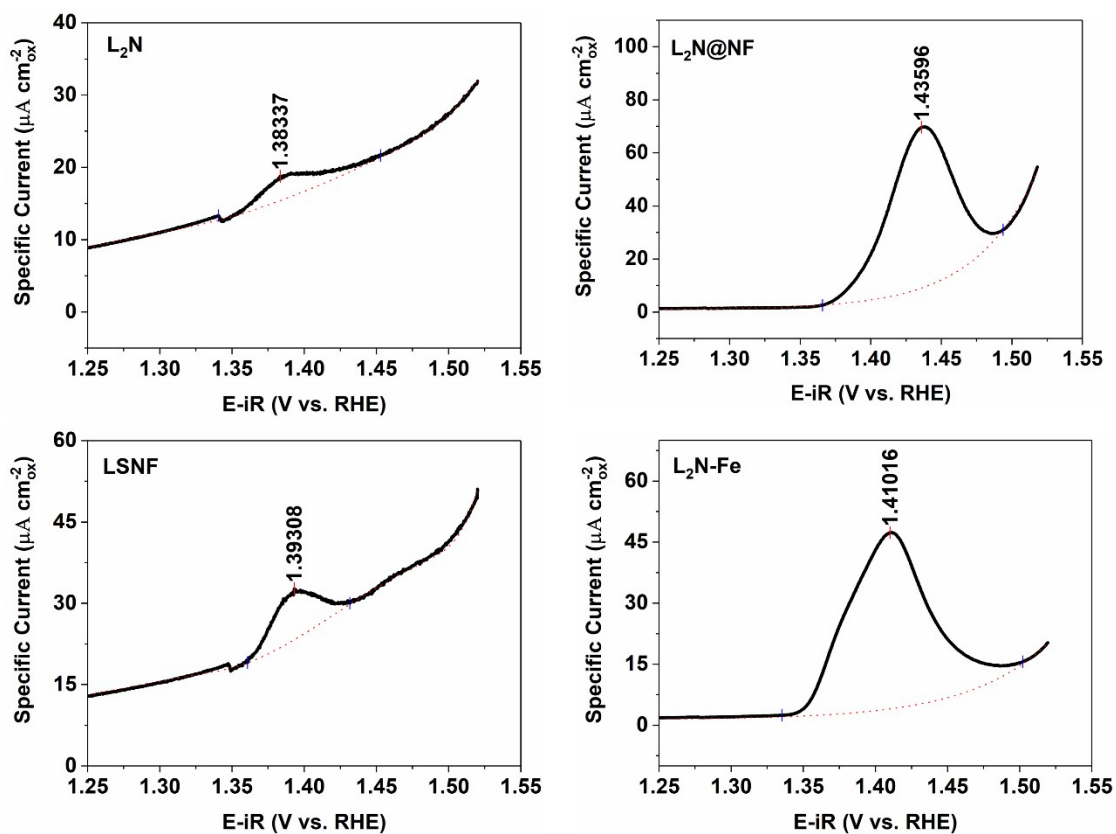

**Figure S21. Fitted intercalation CVs for four samples.** Integrating the region between the solid line and the red dotted line. The current is converted to the specific current according to the BET area.

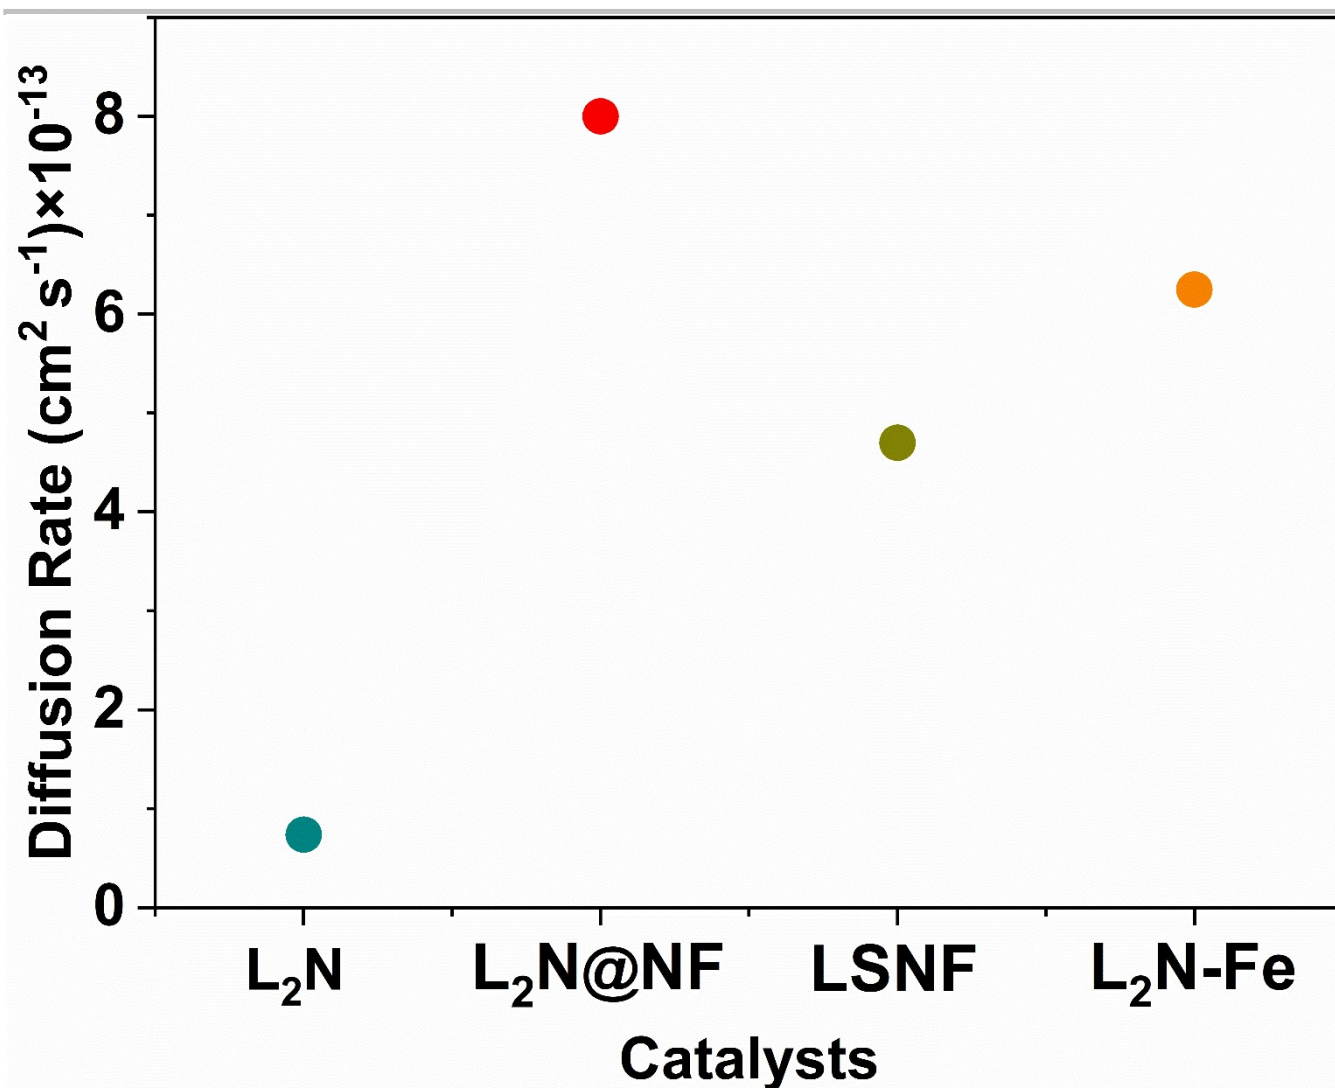

**Figure S22. Oxygen ion diffusion coefficients.** The diffusion rate was calculated from the chronoamperometry data. More details can be found in the section of Electrode preparation and electrochemical characterization.

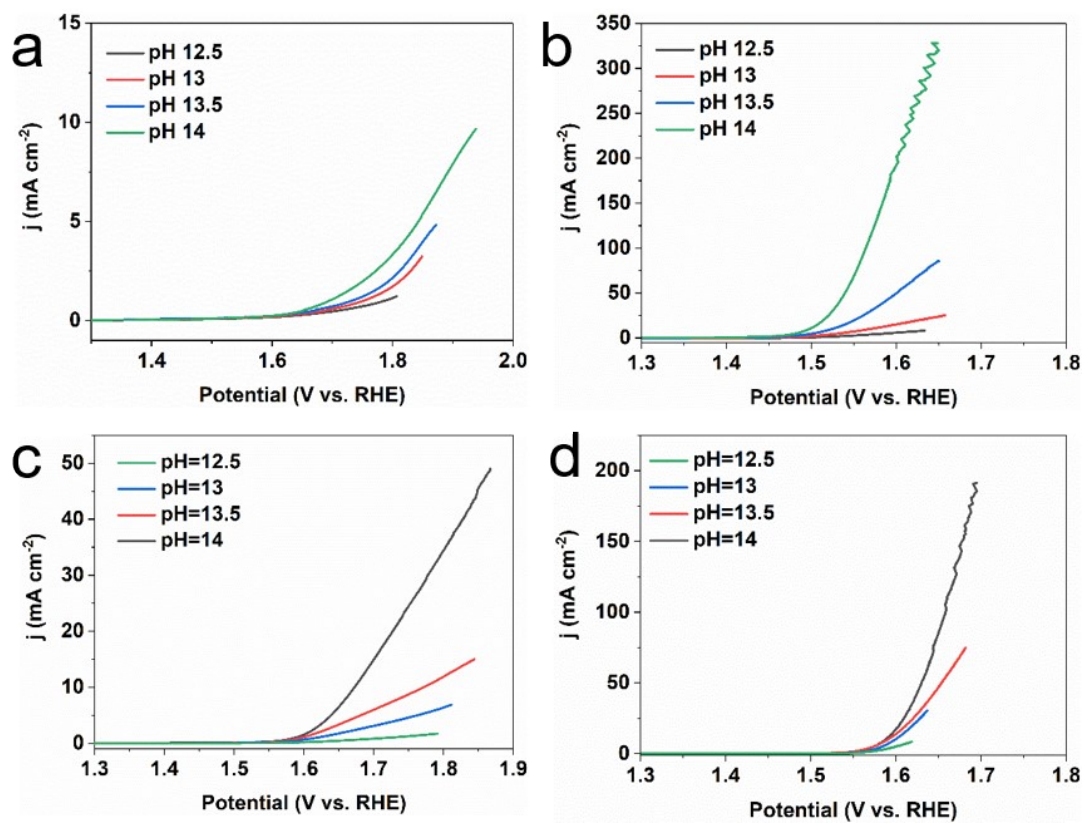

**Figure S23. OER kinetic current density.** LSVs of (a) L<sub>2</sub>N, (b) L<sub>2</sub>N@NF, (c) LSNF and (d) L<sub>2</sub>N-Fe in O<sub>2</sub>-saturated KOH electrolytes with varying pH.

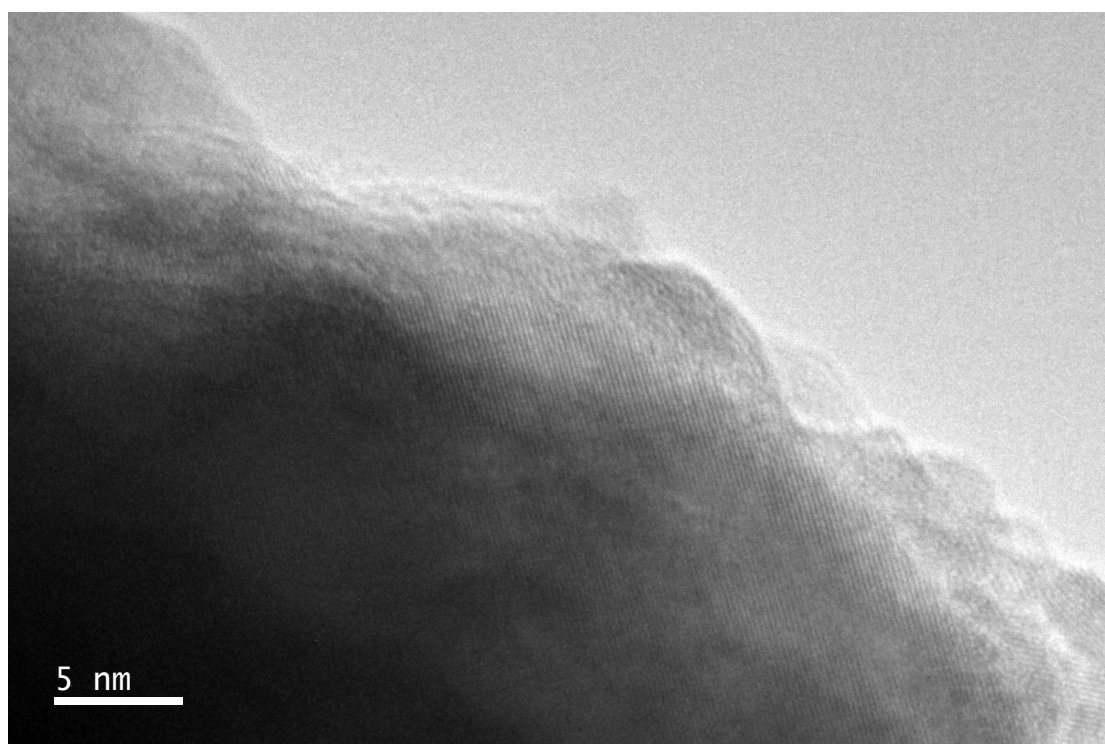

**Figure S24. TEM image.** The TEM image of L<sub>2</sub>N@NF after the stability test.

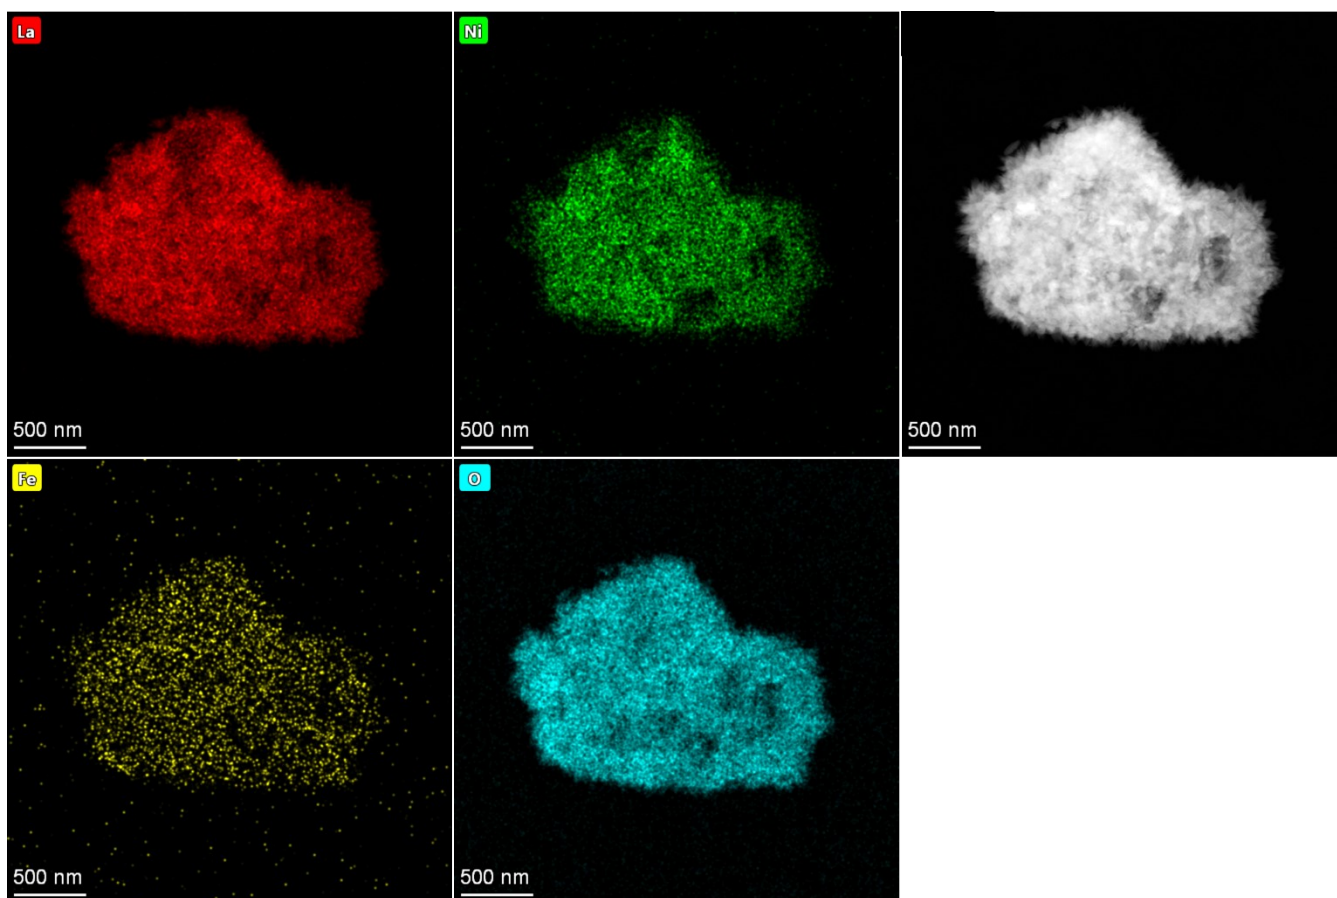

**Figure S25. Elemental mappings.** The elemental mapping of L<sub>2</sub>N@NF after 60 h stability test.

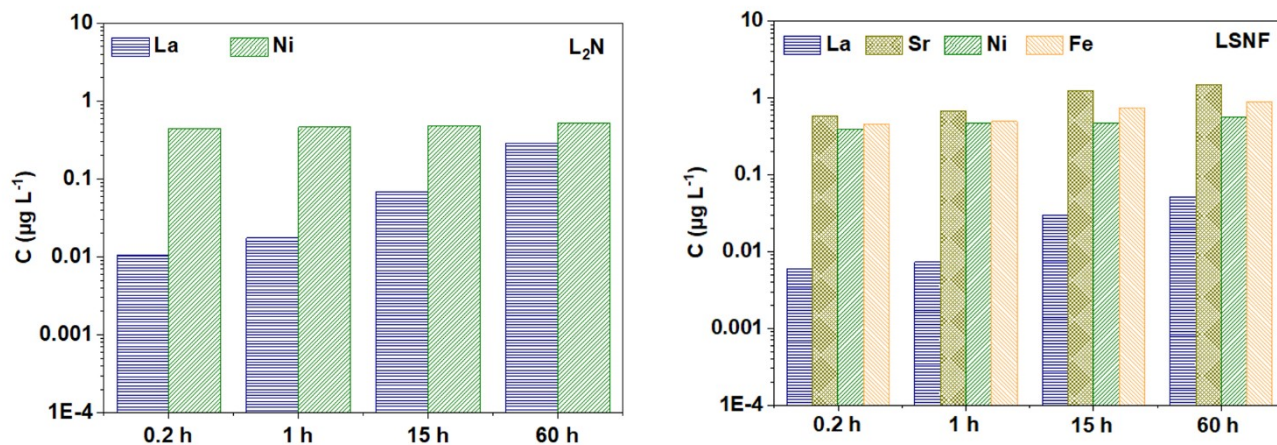

**Figure S26. ICP-MS results.** The dissolved metal concentration in the electrolyte of L<sub>2</sub>N and LSNF at each sampling point from ICP-MS results.

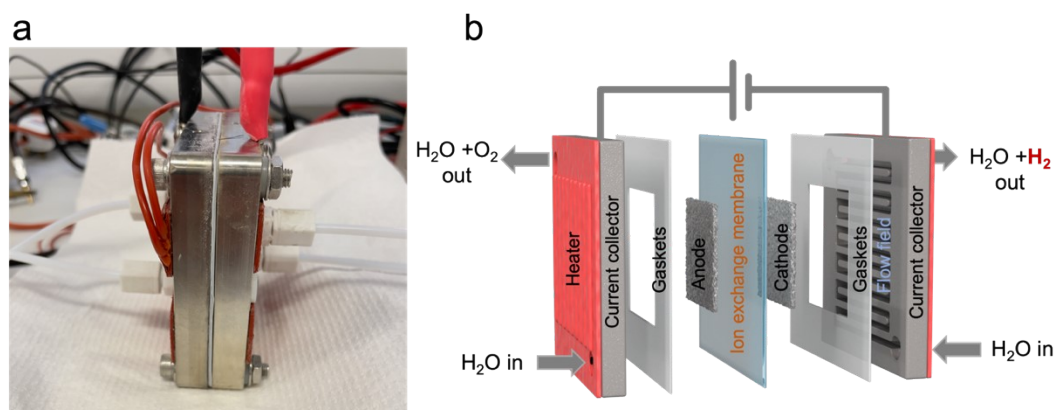

**Figure S27. The optical image of the electrocatalyst system.** (a) Digital photograph and (b) schematic of the anion exchange membrane electrolyzer.

**Table S1. Comparison of the OER performance between the L<sub>2</sub>N@NF catalyst and some state-of-the-art perovskite catalysts.**

| Catalysts                                                                                                    | Substrate | Electrolyte                          | $\eta_{10}$<br>(mV)               | Tafel slope<br>(mV dec <sup>-1</sup> ) | Reference |
|--------------------------------------------------------------------------------------------------------------|-----------|--------------------------------------|-----------------------------------|----------------------------------------|-----------|
| L <sub>2</sub> N@NF                                                                                          | GCE       | 1 M KOH                              | 258                               | 54                                     | This work |
| LSNF30                                                                                                       | GCE       | 0.1M KOH                             | ~365                              | 44                                     | 2         |
| RP-SCFN                                                                                                      | GCE       | 0.1M KOH                             | 334                               | 57                                     | 3         |
| La <sub>2</sub> CoO <sub>4</sub>                                                                             | GCE       | 0.1M KOH                             | 400                               | 64                                     | 4         |
| PBSCF0.45                                                                                                    | GCE       | 1 M KOH                              | 290                               | 69                                     | 5         |
| RP/P-LSCF                                                                                                    | GCE       | 0.1M KOH                             | 324                               | 58                                     | 6         |
| RP-LaSr <sub>3</sub> (Co <sub>0.5</sub> Fe <sub>0.5</sub> ) <sub>3</sub> O <sub>10-<math>\delta</math></sub> | GCE       | 0.1M KOH                             | 388                               | 83.9                                   | 7         |
| La <sub>5</sub> Ni <sub>3</sub> CoO <sub>13-<math>\delta</math></sub>                                        | GCE       | 0.1M KOH                             | 370                               | 35                                     | 8         |
| La <sub>4</sub> Ni <sub>3</sub> O <sub>10.26</sub>                                                           | GCE       | 0.1M KOH                             | 480( $\eta_1$ )                   | 142                                    | 9         |
| H <sub>3.6</sub> IrO <sub>4</sub> ·3.7H <sub>2</sub> O                                                       | GCE       | 0.1 M HClO <sub>4</sub>              | ~270                              | /                                      | 10        |
| SmBaCo <sub>1.5</sub> Mn <sub>0.5</sub> O <sub>5+<math>\delta</math></sub>                                   | pellets   | 1 M KOH                              | 310                               | /                                      | 11        |
| LSCN8264                                                                                                     | GCE       | 1 M KOH                              | 290                               | /                                      | 12        |
| BSCFI-91                                                                                                     | GCE       | 1 M KOH                              | 300                               | 61.2                                   | 13        |
| LFNO-II NRs                                                                                                  | GCE       | 1 M KOH                              | 302                               | 50                                     | 14        |
| LNMO-1                                                                                                       | GCE       | 1 M KOH                              | 370                               | 58                                     | 15        |
| SNCF-NRs                                                                                                     | GCE       | 0.1M KOH                             | 390                               | 61                                     | 16        |
| La <sub>2</sub> Li <sub>0.5</sub> Ni <sub>0.5</sub> O <sub>4</sub>                                           | GCE       | 0.1M KOH                             | ~410( $\eta_1$ )                  | 90                                     | 17        |
| NiO-(La <sub>0.613</sub> Ca <sub>0.387</sub> ) <sub>2</sub> NiO <sub>3.562</sub>                             | GCE       | 0.1M KOH                             | 373                               | 42                                     | 18        |
| NMP-treated Sr <sub>3</sub> FeCoO <sub>7-<math>\delta</math></sub>                                           | GCE       | 1 M KOH                              | 343                               | 63                                     | 19        |
| LSN-03                                                                                                       | GCE       | 0.1M KOH                             | ~520( $\eta_{0.8}$ )*             | /                                      | 20        |
| La <sub>3</sub> SrNi <sub>3</sub> O <sub>10</sub>                                                            | GCE       | 0.1M KOH                             | 500                               | 89                                     | 21        |
| r-LSCF-P                                                                                                     | GCE       | 0.1M KOH                             | 350                               | 64                                     | 22        |
| LP-LaSr <sub>3</sub> Co <sub>1.5</sub> Fe <sub>1.5</sub> O <sub>10-<math>\delta</math></sub>                 | GCE       | 0.1M KOH                             | 388                               | 83.9                                   | 23        |
| BCTO                                                                                                         | GCE       | 0.1M KOH                             | 470                               | 87                                     | 24        |
| Bi <sub>4</sub> Ti <sub>3</sub> O <sub>12</sub> ·(BiCoO <sub>3</sub> ) <sub>2</sub>                          | GCE       | 1 M NaOH                             | 320                               | 34                                     | 25        |
| Sr <sub>3</sub> Co <sub>2</sub> O <sub>5</sub> Cl <sub>2</sub>                                               | GCE       | 1 M KOH                              | 350                               | 62                                     | 26        |
| OP-SLNO                                                                                                      | GCE       | 0.1M KOH                             | 490                               | 151.4                                  | 27        |
| Sr <sub>3</sub> Ir <sub>2</sub> O <sub>7</sub>                                                               | GCE       | 1 M KOH                              | 296                               | 53                                     | 28        |
|                                                                                                              |           | 0.5 M H <sub>2</sub> SO <sub>4</sub> | 259                               | 50                                     |           |
| Sr <sub>2</sub> IrO <sub>4</sub>                                                                             | GCE       | 0.5 M H <sub>2</sub> SO <sub>4</sub> | 360( $\eta_{50.4}$ ) <sup>a</sup> | /                                      | 29        |
|                                                                                                              |           | 0.1 M HClO <sub>4</sub>              | 290                               | 45/73 <sup>b</sup>                     |           |
| Sr <sub>2</sub> IrO <sub>4</sub>                                                                             | GCE       | 0.5 M H <sub>2</sub> SO <sub>4</sub> | 291                               | 40/120 <sup>b</sup>                    | 30        |

\*: Ohmic potential drop was not compensated for in this measurement.

a: The current density 50.4 mA cm<sup>-2</sup><sub>disk</sub> was calculated from the article data. The overpotential 360 mV was also higher than our results at the current density of 50.4 mA cm<sup>-2</sup><sub>disk</sub>.

b: The numbers before and after indicated Tafel slope fitted at low current densities and high current densities, respectively.

**Table S2. Chemical composition of the L<sub>2</sub>N and L<sub>2</sub>N@NF samples.**

| Catalysts           | La (mg L <sup>-1</sup> ) | Ni (mg L <sup>-1</sup> ) | Fe (mg L <sup>-1</sup> ) | Composition ratio                                               |
|---------------------|--------------------------|--------------------------|--------------------------|-----------------------------------------------------------------|
| L <sub>2</sub> N    | 36.43                    | 7.989                    | /                        | La <sub>1.93</sub> NiO <sub>4</sub>                             |
| L <sub>2</sub> N@NF | 20.02                    | 4.792                    | 1.684                    | La <sub>0.1441</sub> Ni <sub>0.0816</sub> Fe <sub>0.03015</sub> |

**Table S3. Surface atomic concentration from XPS.**

| Catalysts           | La (Sr) | Ni     | Fe     |
|---------------------|---------|--------|--------|
| L <sub>2</sub> N    | 83.05%  | 16.95% | /      |
| L <sub>2</sub> N@NF | 49.31%  | 24.66% | 26.03% |
| LSNF                | 76.66%  | 13.27% | 10.07% |
| L <sub>2</sub> N-Fe | 52.88%  | 2.46%  | 44.66% |

The surface element content of LSNF and L<sub>2</sub>N-Fe measured by XPS also proved the successful application of our surface tailoring strategy. The approximate element ratio of La (Sr)/Ni/Fe on LSNF and L<sub>2</sub>N surfaces indicates the La/Sr-terminal of LSNF. Nearly half of the Fe content on L<sub>2</sub>N-Fe surface indicates a large deposition of Fe. Furthermore, the amount of La on L<sub>2</sub>N-Fe surface was reduced to almost half, which may be part of La wrapped in Ni/Fe during the 40-cycle LSVs.

**Table S4. Comparison of the OER intrinsic activity between the L<sub>2</sub>N@NF catalyst and some well-known NiFe catalysts.**

| Catalysts                                 | TOF(s <sup>-1</sup> )<br>@300mV | Electrolyte | η <sub>10</sub><br>(mV) | Tafel slope<br>(mV dec <sup>-1</sup> ) | Reference |
|-------------------------------------------|---------------------------------|-------------|-------------------------|----------------------------------------|-----------|
| L <sub>2</sub> N@NF                       | 1.8                             | 1 M KOH     | 258                     | 54                                     | This work |
| F-NiFe-A                                  | 0.25 ± 0.03                     | 1M KOH      | 218                     | 31                                     | 31        |
| S-NiCoFe LDH/CC                           | 0.102                           | 1M KOH      | 206                     | 48                                     | 32        |
| NiFe-LDH HMS/NF                           | 0.206                           | 1M KOH      | 239                     | 53                                     | 33        |
| NiO/NiFe LDH                              | 0.71                            | 1 M KOH     | 274(η <sub>100</sub> )  | 30                                     | 34        |
| Fe <sup>2+</sup> - NiFe LDH               | 0.09                            | 1M KOH      | 249                     | 40.3                                   | 35        |
| Ni <sub>0.67</sub> Fe <sub>0.33</sub> /C  | 0.3                             | 1M KOH      | 210                     | 35.1                                   | 36        |
| FeNi LDH                                  | 0.028                           | 1M KOH      | 232                     | 48                                     | 37        |
| Ni(Fe)O <sub>x</sub> H <sub>y</sub>       | ~0.75                           | 1M KOH      | /                       | /                                      | 38        |
| Ni <sub>0.75</sub> Fe <sub>0.25</sub> OOH | 9(η <sub>350</sub> )            | 1M KOH      | /                       | /                                      | 39        |
| Ni <sub>45</sub> Fe <sub>55</sub>         | 0.14                            | 0.1 M KOH   | ~310                    | 35                                     | 40        |
| Ni <sub>65</sub> +Fe <sub>35</sub> p.m.   | 0.1                             | 0.1 M KOH   | 298                     | 37                                     | 41        |
| Ni <sub>2</sub> Fe <sub>1</sub> /C        | 1.04                            | 1 M KOH     | 250                     | /                                      | 42        |
| Ni <sub>2/3</sub> Fe <sub>1/3</sub> -rGO  | 0.1                             | 1 M KOH     | 210                     | 40                                     | 43        |
| Ultrathin LDH                             | 0.14577                         | 1 M KOH     | 210                     | 31                                     | 44        |
| Ni <sub>8</sub> Fe-LDH@CNTs               | 0.35                            | 1M KOH      | 220                     | 34                                     | 45        |
| FeNi-rGO LDH                              | 0.987                           | 0.1M KOH    | ~205                    | 39                                     | 46        |



**Table S5. Specific surface areas of four samples measured by nitrogen adsorption testing using the BET method.**

| Catalysts           | S(m <sup>2</sup> g <sup>-1</sup> ) | Pore volume(cm <sup>3</sup> g <sup>-1</sup> ) |
|---------------------|------------------------------------|-----------------------------------------------|
| L <sub>2</sub> N    | 1.65                               | 0.006747                                      |
| L <sub>2</sub> N@NF | 13.6                               | 0.051236                                      |
| LSNF                | 1.16                               | 0.004862                                      |
| L <sub>2</sub> N-Fe | 10.8                               | 0.023367                                      |

**Table S6. MEA stability and the corresponding test conditions of some state-of-the-art electrocatalysts.**

| Catalysts (anode//cathode)                                                        | Stability                | Current density<br>(mA cm <sup>-2</sup> ) | Temperature<br>(°C) | Membrane                     | Ref.         |
|-----------------------------------------------------------------------------------|--------------------------|-------------------------------------------|---------------------|------------------------------|--------------|
| L <sub>2</sub> N@NF//Pt/C                                                         | 300 h                    | 200                                       | 60                  | Sustanion X37-50<br>grade RT | This<br>work |
| IrO <sub>2</sub> //Pt/C                                                           | 34 h                     | 200                                       | 60                  | Sustanion X37-50<br>grade RT | This<br>work |
| Fe-NiMoNH <sub>3</sub> /H <sub>2</sub> //NiMo-<br>NH <sub>3</sub> /H <sub>2</sub> | 25 h                     | 500                                       | 20                  | Sustanion X37-50<br>grade T  | 47           |
| BSCF-FS//Pt/C                                                                     | 5 h                      | 200                                       | 50                  | Tokuyama supplied<br>A201    | 48           |
| (NiCo) <sub>3</sub> Se <sub>4</sub> //Pt/C                                        | First segment<br>50h     | 1000                                      | 25                  | Sustanion X37-50             | 49           |
| (NiCo) <sub>3</sub> Se <sub>4</sub> //Pt/C                                        | Second<br>segment<br>40h | 1000                                      | 60                  | Sustanion X37-50             | 49           |
| NiFe nanofoam//PtRu/C                                                             | 170 h                    | 200                                       | 60                  | HTMA-DAPP                    | 50           |
| NiCoFeO <sub>x</sub> //Pt/C                                                       | 180 h                    | 200                                       | 50                  | FAA-3                        | 51           |

## References

- 1 M. Burriel, S. Wilkins, J.P. Hill, M.A. Muñoz-Márquez, H.H. Brongersma, J.A. Kilner, M.P. Ryan and S.J. Skinner, *Energy Environ. Sci.*, 2014, **7**, 311-316.
- 2 R.P. Forslund, W.G. Hardin, X. Rong, A.M. Abakumov, D. Filimonov, C.T. Alexander, J.T. Mefford, H. Iyer, A.M. Kolpak, K.P. Johnston and K.J. Stevenson, *Nat. Commun.*, 2018, **9**, 3150.
- 3 Y. Zhu, H.A. Tahini, Z. Hu, Y. Yin, Q. Lin, H. Sun, Y. Zhong, Y. Chen, F. Zhang, H.-J. Lin, C.-T. Chen, W. Zhou, X. Zhang, S.C. Smith, Z. Shao and H. Wang, *EcoMat.*, 2020, **2**, e12021.
- 4 B. Yin, Y. Li, N. Sun, X. Ji, Y. Huan, D. Dong, X. Hu and T. Wei, *Electrochim. Acta.*, 2021, **370**, 137747.
- 5 H. Jo, Y. Yang, A. Seong, D. Jeong, J. Kim, S.H. Joo, Y.J. Kim, L. Zhang, Z. Liu, J.-Q. Wang, S.K. Kwak and G.

- 
- Kim, *J. Mater. Chem. A*, 2022, **10**, 2271-2279.
- 6 Y. Zhu, Q. Lin, Z. Hu, Y. Chen, Y. Yin, H.A. Tahini, H.-J. Lin, C.-T. Chen, X. Zhang, Z. Shao and H. Wang, *Small*, 2020, **16**, 2001204.
- 7 S. Liu, C. Sun, J. Chen, J. Xiao and J.-L. Luo, *ACS Catal.*, 2020, **10**, 13437-13444.
- 8 S.R. Choi, J.-I. Lee, H. Park, S.W. Lee, D.Y. Kim, W.Y. An, J.H. Kim, J. Kim, H.-S. Cho and J.-Y. Park, *Chem. Eng. J.*, 2021, **409**, 128226.
- 9 J. Yu, J. Sunarso, Y. Zhu, X. Xu, R. Ran, W. Zhou and Z. Shao, *Chem. Eur. J.*, 2016, **22**, 2719-2727.
- 10 R. Zhang, P.E. Pearce, V. Pimenta, J. Cabana, H. Li, D. Alves Dalla Corte, A.M. Abakumov, G. Rousse, D. Giaume, M. Deschamps and A. Grimaud, *Chem. Mater.*, 2020, **32**, 3499-3509.
- 11 A. Olszewska, K. Świerczek and A. Niemczyk, *Crystals*, 2020, **10**, 205.
- 12 J. Cheng, Z. Wang, L. Zou, M. Zhang, G. Zhang, Y. Dong, Y. Jiang, Y. Huang, N. Nakashima and B. Chi, *J. Alloy. Compd.*, 2020, **831**, 154728.
- 13 Q. Luo, D. Lin, W. Zhan, W. Zhang, L. Tang, J. Luo, Z. Gao, P. Jiang, M. Wang, L. Hao and K. Tang, *ACS Appl. Energy Mater.*, 2020, **3**, 7149-7158.
- 14 H. Wang, J. Wang, Y. Pi, Q. Shao, Y. Tan and X. Huang, *Angew. Chem. Int. Ed.*, 2019, **58**, 2316-2320.
- 15 Y. Tong, J. Wu, P. Chen, H. Liu, W. Chu, C. Wu and Y. Xie, *J. Am. Chem. Soc.*, 2018, **140**, 11165-11169.
- 16 Y. Zhu, W. Zhou, Y. Zhong, Y. Bu, X. Chen, Q. Zhong, M. Liu and Z. Shao, *Adv. Energy Mater.*, 2017, **7**, 1602122.
- 17 C. Yang, M. Batuk, Q. Jacquet, G. Rousse, W. Yin, L. Zhang, J. Hadermann, A.M. Abakumov, G. Cibirin, A. Chadwick, J.-M. Tarascon and A. Grimaud, *ACS Energy Lett.*, 2018, **3**, 2884-2890.
- 18 R. Liu, F. Liang, W. Zhou, Y. Yang and Z. Zhu, *Nano Energy*, 2015, **12**, 115-122.
- 19 K. Xu, F. Song, J. Gu, X. Xu, Z. Liu and X. Hu, *J. Mater. Chem. A*, 2018, **6**, 14240-14245.
- 20 K.-N. Jung, J.-H. Jung, W.B. Im, S. Yoon, K.-H. Shin and J.-W. Lee, *ACS Appl. Mater. Interfaces*, 2013, **5**, 9902-9907.
- 21 C. Cao, C. Shang, X. Li, Y. Wang, C. Liu, X. Wang, S. Zhou and J. Zeng, *Nano Lett.*, 2020, **20**, 2837-2842.
- 22 C. Li, Y. Wang, C. Jin, J. Lu, J. Sun and R. Yang, *Int. J. Hydrogen Energy*, 2020, **45**, 22959-22964.
- 23 S. Liu, H. Luo, Y. Li, Q. Liu and J.-L. Luo, *Nano Energy*, 2017, **40**, 115-121.
- 24 X. Li, Y. Sun, Q. Wu, H. Liu, W. Gu, X. Wang, Z. Cheng, Z. Fu and Y. Lu, *J. Am. Chem. Soc.*, 2019, **141**, 3121-3128.
- 25 X. Li, H. Liu, Z. Chen, Q. Wu, Z. Yu, M. Yang, X. Wang, Z. Cheng, Z. Fu and Y. Lu, *Nat. Commun.*, 2019, **10**, 1409.
- 26 Y. Miyahara, K. Miyazaki, T. Fukutsuka and T. Abe, *Chem. Commun.*, 2017, **53**, 2713-2716.
- 27 H. Kim, Y.S. Lim and J.H. Kim, *Chem. Eng. J.*, 2022, **431**, 134278.
- 28 C. Zhu, H. Tian, B. Huang, G. Cai, C. Yuan, Y. Zhang, Y. Li, G. Li, H. Xu and M.-R. Li, *Chem. Eng. J.*, 2021, **423**, 130185.
- 29 C.W. Song, J. Lim, H.B. Bae and S.-Y. Chung, *Energy Environ. Sci.*, 2020, **13**, 4178-4188.
- 30 A.L. Strickler, D. Higgins and T.F. Jaramillo, *ACS Appl. Energy Mater.*, 2019, **2**, 5490-5498.
- 31 Q. Xu, H. Jiang, X. Duan, Z. Jiang, Y. Hu, S. W. Boettcher, W. Zhang, S. Guo and C. Li, *Nano Lett.*, 2021, **21**, 492-499.
- 32 L.M. Cao, J.W. Wang, D.C. Zhong and T.B. Lu, *J. Mater. Chem. A*, 2018, **6**, 3224.
- 33 C. Zhang, M. Shao, L. Zhou, Z. Li, K. Xiao and M. Wei, *ACS Appl. Mater. Interfaces*, 2016, **8**, 33697-33703.

- 
- 34 Z. W. Gao, J. Y. Liu, X. M. Chen, X. L. Zheng, J. Mao, H. Liu, T. Ma, L. Li, W.C. Wang and X.W. Du, *Adv. Mater.*, 2019, **31**, 1804769.
- 35 Z. Cai, D. Zhou, M. Wang, S.-M. Bak, Y. Wu, Z. Wu, Y. Tian, X. Xiong, Y. Li, W. Liu, S. Siahrostami, Y. Kuang, X.-Q. Yang, H. Duan, Z. Feng, H. Wang and X. Sun, *Angew. Chem. Int. Ed.*, 2018, **57**, 9392-9396.
- 36 S. Yin, W. Tu, Y. Sheng, Y. Du, M. Kraft, A. Borgna and R. Xu, *Adv. Mater.*, 2018, **30**, 1705106.
- 37 X. Long, J. Li, S. Xiao, K. Yan, Z. Wang, H. Chen and S. Yang, *Angew. Chem.*, 2014, **126**, 7714-7718.
- 38 M.B. Stevens, C.D.M. Trang, L.J. Deng and S.W. Boettcher, *J. Am. Chem. Soc.*, 2017, **139**, 11361-11364.
- 39 S. Zou, M.S. Burke, M.G. Kast, J. Fan, N. Danilovic and S.W. Boettcher, *Chem. Mater.*, 2015, **27**, 8011-8020.
- 40 M. Görlin, P. Chernev, J.F. de Araújo, T. Reier, S. Dresch, B. Paul, R. Krähnert, H. Dau and P. Strasser, *J. Am. Chem. Soc.*, 2016, **138**, 5603-5614.
- 41 M. Görlin, P. Chernev, P. Paciok, C.-W. Tai, J.F. de Araújo, T. Reier, M. Heggen, R. Dunin-Borkowski, P. Strasser and H. Dau, *Chem. Commun.*, 2019, **55**, 818-821.
- 42 Y.-J. Ko, M.H. Han, H. Kim, J.-Y. Kim, W.H. Lee, J. Kim, J.Y. Kwak, C.-H. Kim, T.-E. Park, S.-H. Yu, W.-S. Lee, C.H. Choi, P. Strasser and H.-S. Oh, *Chem Catalysis*, 2022, **2**, 2312-2327.
43. W. Ma, R. Ma, C. Wang, J. Liang, X. Liu, K. Zhou and T. Sasaki, *ACS Nano*, 2015, **9**, 1977-1984.
- 44 C. Kuai, Y. Zhang, D. Wu, D. Sokaras, L. Mu, S. Spence, D. Nordlund, F. Lin and X.-W. Du, *ACS Catal.*, 2019, **9**, 6027-6032.
- 45 D. Zhao, K. Jiang, Y. Pi, and X. Huang, *ChemCatChem*, 2017, **9**, 84-88.
- 46 X. Long, J. Li, S. Xiao, K. Yan, Z. Wang, H. Chen and S. Yang, *Angew. Chem. Int. Ed.*, 2014, **53**, 7584-7588.
- 47 P. Chen and X. Hu, *Adv. Energy Mater.*, 2020, **10**, 2002285.
- 48 E. Fabbri, M. Nachttegaal, T. Binninger, X. Cheng, B.-J. Kim, J. Durst, F. Bozza, T. Graule, R. Schäublin, L. Wiles, M. Pertoso, N. Danilovic, K.E. Ayers and T.J. Schmidt, *Nat. Mater.*, 2017, **16**, 925-931.
- 49 J. Abed, S. Ahmadi, L. Laverdure, A. Abdellah, C.P. O'Brien, K. Cole, P. Sobrinho, D. Sinton, D. Higgins, N. J. Mosey, S.J. Thorpe and E.H. Sargent, *Adv. Mater.*, 2021, **33**, 2103812.
- 50 D. Li, E.J. Park, W. Zhu, Q. Shi, Y. Zhou, H. Tian, Y. Lin, A. Serov, B. Zulevi, E.D. Baca, C. Fujimoto, H.T. Chung and Y.S. Kim, *Nat. Energy.*, 2020, **5**, 378-385.
- 51 D. Xu, M.B. Stevens, M.R. Cosby, S. Z. Oener, A.M. Smith, L.J. Enman, K.E. Ayers, C.B. Capuano, J.N. Renner, N. Danilovic, Y. Li, H. Wang, Q. Zhang and S.W. Boettcher, *ACS Catal.*, 2019, **9**, 7-15.
